# Supplementary material for: The SUPER reporting guideline suggested for reporting of surgical technique
Source: PubMed Central journal article supplement — Hepatobiliary Surg Nutr. 2023 Jan 10;12(4):534–44. doi: 10.21037/hbsn-22-509 (PMC10432285; doi:10.21037/hbsn-22-509), 2023-01-10
Supplement: hbsn-12-04-534-coif.pdf [file hbsn-12-04-534-coif.pdf]

## ICMJE DISCLOSURE FORM

Date: Dec 13, 2022

Your Name: Kaiping Zhang

Manuscript Title: The SUPER 2022 reporting guideline for suggested reporting of surgical technique

Manuscript number (if known): HBSN-22-509

In the interest of transparency, we ask you to disclose all relationships/activities/interests listed below that are related to the content of your manuscript. "Related" means any relation with for-profit or not-for-profit third parties whose interests may be affected by the content of the manuscript. Disclosure represents a commitment to transparency and does not necessarily indicate a bias. If you are in doubt about whether to list a relationship/activity/interest, it is preferable that you do so.

The following questions apply to the author's relationships/activities/interests as they relate to the current manuscript only.

The author's relationships/activities/interests should be defined broadly. For example, if your manuscript pertains to the epidemiology of hypertension, you should declare all relationships with manufacturers of antihypertensive medication, even if that medication is not mentioned in the manuscript.

In item #1 below, report all support for the work reported in this manuscript without time limit. For all other items, the time frame for disclosure is the past 36 months.

|                                                           |                                                                                                                                                                                | Name all entities with whom you have this relationship or indicate none (add rows as needed) | Specifications/Comments (e.g., if payments were made to you or to your institution) |
|-----------------------------------------------------------|--------------------------------------------------------------------------------------------------------------------------------------------------------------------------------|----------------------------------------------------------------------------------------------|-------------------------------------------------------------------------------------|
| <b>Time frame: Since the initial planning of the work</b> |                                                                                                                                                                                |                                                                                              |                                                                                     |
| 1                                                         | All support for the present manuscript (e.g., funding, provision of study materials, medical writing, article processing charges, etc.)<br><b>No time limit for this item.</b> | None                                                                                         |                                                                                     |
|                                                           |                                                                                                                                                                                |                                                                                              |                                                                                     |
|                                                           |                                                                                                                                                                                |                                                                                              |                                                                                     |
|                                                           |                                                                                                                                                                                |                                                                                              |                                                                                     |
|                                                           |                                                                                                                                                                                |                                                                                              |                                                                                     |
|                                                           |                                                                                                                                                                                |                                                                                              |                                                                                     |
| <b>Time frame: past 36 months</b>                         |                                                                                                                                                                                |                                                                                              |                                                                                     |
| 2                                                         | Grants or contracts from any entity (if not indicated in item #1 above).                                                                                                       | None                                                                                         |                                                                                     |
|                                                           |                                                                                                                                                                                |                                                                                              |                                                                                     |
| 3                                                         | Royalties or licenses                                                                                                                                                          | None                                                                                         |                                                                                     |
|                                                           |                                                                                                                                                                                |                                                                                              |                                                                                     |
| 4                                                         | Consulting fees                                                                                                                                                                | None                                                                                         |                                                                                     |
|                                                           |                                                                                                                                                                                |                                                                                              |                                                                                     |
| 5                                                         | Payment or honoraria for                                                                                                                                                       | None                                                                                         |                                                                                     |

|    |                                                                                                   |                        |                                                                                                                        |
|----|---------------------------------------------------------------------------------------------------|------------------------|------------------------------------------------------------------------------------------------------------------------|
|    | lectures, presentations, speakers bureaus, manuscript writing or educational events               |                        |                                                                                                                        |
| 6  | Payment for expert testimony                                                                      | None                   |                                                                                                                        |
| 7  | Support for attending meetings and/or travel                                                      | None                   |                                                                                                                        |
| 8  | Patents planned, issued or pending                                                                | None                   |                                                                                                                        |
| 9  | Participation on a Data Safety Monitoring Board or Advisory Board                                 | None                   |                                                                                                                        |
| 10 | Leadership or fiduciary role in other board, society, committee or advocacy group, paid or unpaid | None                   |                                                                                                                        |
| 11 | Stock or stock options                                                                            | None                   |                                                                                                                        |
| 12 | Receipt of equipment, materials, drugs, medical writing, gifts or other services                  | None                   |                                                                                                                        |
| 13 | Other financial or non-financial interests                                                        | AME Publishing Company | Kaiping Zhang is a full-time employee of AME Publishing Company (the publisher of Hepatobiliary Surgery and Nutrition) |

**Please summarize the above conflict of interest in the following box:**

Kaiping Zhang is a full-time employee of AME publishing company (publisher of Hepatobiliary Surgery and Nutrition).

**Please place an "X" next to the following statement to indicate your agreement:**

I certify that I have answered every question and have not altered the wording of any of the questions on this form.

## ICMJE DISCLOSURE FORM

Date: December 13, 2022  
 Your Name: Yanfang Ma  
 Manuscript Title: The SUPER 2022 reporting guideline for suggested reporting of surgical technique  
 Manuscript number (if known): HBSN-22-509-R1

In the interest of transparency, we ask you to disclose all relationships/activities/interests listed below that are related to the content of your manuscript. "Related" means any relation with for-profit or not-for-profit third parties whose interests may be affected by the content of the manuscript. Disclosure represents a commitment to transparency and does not necessarily indicate a bias. If you are in doubt about whether to list a relationship/activity/interest, it is preferable that you do so.

The following questions apply to the author's relationships/activities/interests as they relate to the **current manuscript only**.

The author's relationships/activities/interests should be **defined broadly**. For example, if your manuscript pertains to the epidemiology of hypertension, you should declare all relationships with manufacturers of antihypertensive medication, even if that medication is not mentioned in the manuscript.

In item #1 below, report all support for the work reported in this manuscript without time limit. For all other items, the time frame for disclosure is the past 36 months.

|                                                           |                                                                                                                                                                                | Name all entities with whom you have this relationship or indicate none (add rows as needed) | Specifications/Comments (e.g., if payments were made to you or to your institution) |
|-----------------------------------------------------------|--------------------------------------------------------------------------------------------------------------------------------------------------------------------------------|----------------------------------------------------------------------------------------------|-------------------------------------------------------------------------------------|
| <b>Time frame: Since the initial planning of the work</b> |                                                                                                                                                                                |                                                                                              |                                                                                     |
| 1                                                         | All support for the present manuscript (e.g., funding, provision of study materials, medical writing, article processing charges, etc.)<br><b>No time limit for this item.</b> | None                                                                                         |                                                                                     |
|                                                           |                                                                                                                                                                                |                                                                                              |                                                                                     |
|                                                           |                                                                                                                                                                                |                                                                                              |                                                                                     |
|                                                           |                                                                                                                                                                                |                                                                                              |                                                                                     |
|                                                           |                                                                                                                                                                                |                                                                                              |                                                                                     |
|                                                           |                                                                                                                                                                                |                                                                                              |                                                                                     |
| <b>Time frame: past 36 months</b>                         |                                                                                                                                                                                |                                                                                              |                                                                                     |
| 2                                                         | Grants or contracts from any entity (if not indicated in item #1 above).                                                                                                       | None                                                                                         |                                                                                     |
|                                                           |                                                                                                                                                                                |                                                                                              |                                                                                     |
| 3                                                         | Royalties or licenses                                                                                                                                                          | None                                                                                         |                                                                                     |
|                                                           |                                                                                                                                                                                |                                                                                              |                                                                                     |
| 4                                                         | Consulting fees                                                                                                                                                                | None                                                                                         |                                                                                     |
|                                                           |                                                                                                                                                                                |                                                                                              |                                                                                     |
|                                                           |                                                                                                                                                                                |                                                                                              |                                                                                     |

|    |                                                                                                              |      |  |
|----|--------------------------------------------------------------------------------------------------------------|------|--|
| 5  | Payment or honoraria for lectures, presentations, speakers bureaus, manuscript writing or educational events | None |  |
|    |                                                                                                              |      |  |
|    |                                                                                                              |      |  |
| 6  | Payment for expert testimony                                                                                 | None |  |
|    |                                                                                                              |      |  |
|    |                                                                                                              |      |  |
| 7  | Support for attending meetings and/or travel                                                                 | None |  |
|    |                                                                                                              |      |  |
|    |                                                                                                              |      |  |
| 8  | Patents planned, issued or pending                                                                           | None |  |
|    |                                                                                                              |      |  |
|    |                                                                                                              |      |  |
| 9  | Participation on a Data Safety Monitoring Board or Advisory Board                                            | None |  |
|    |                                                                                                              |      |  |
|    |                                                                                                              |      |  |
| 10 | Leadership or fiduciary role in other board, society, committee or advocacy group, paid or unpaid            | None |  |
|    |                                                                                                              |      |  |
|    |                                                                                                              |      |  |
| 11 | Stock or stock options                                                                                       | None |  |
|    |                                                                                                              |      |  |
|    |                                                                                                              |      |  |
| 12 | Receipt of equipment, materials, drugs, medical writing, gifts or other services                             | None |  |
|    |                                                                                                              |      |  |
|    |                                                                                                              |      |  |
| 13 | Other financial or non-financial interests                                                                   | None |  |
|    |                                                                                                              |      |  |
|    |                                                                                                              |      |  |

**Please summarize the above conflict of interest in the following box:**

|      |
|------|
| None |
|------|

**Please place an "X" next to the following statement to indicate your agreement:**

**X I certify that I have answered every question and have not altered the wording of any of the questions on this form.**

## ICMJE DISCLOSURE FORM

Date: 2022-12-13  
 Your Name: Jinlin Wu  
 Manuscript Title: The SUPER 2022 reporting guideline for suggested reporting of surgical technique  
 Manuscript number (if known): HBSN-22-509-R1

In the interest of transparency, we ask you to disclose all relationships/activities/interests listed below that are related to the content of your manuscript. “Related” means any relation with for-profit or not-for-profit third parties whose interests may be affected by the content of the manuscript. Disclosure represents a commitment to transparency and does not necessarily indicate a bias. If you are in doubt about whether to list a relationship/activity/interest, it is preferable that you do so.

The following questions apply to the author’s relationships/activities/interests as they relate to the current manuscript only.

The author’s relationships/activities/interests should be defined broadly. For example, if your manuscript pertains to the epidemiology of hypertension, you should declare all relationships with manufacturers of antihypertensive medication, even if that medication is not mentioned in the manuscript.

In item #1 below, report all support for the work reported in this manuscript without time limit. For all other items, the time frame for disclosure is the past 36 months.

|                                                           |                                                                                                                                                                                | Name all entities with whom you have this relationship or indicate none (add rows as needed) | Specifications/Comments (e.g., if payments were made to you or to your institution) |
|-----------------------------------------------------------|--------------------------------------------------------------------------------------------------------------------------------------------------------------------------------|----------------------------------------------------------------------------------------------|-------------------------------------------------------------------------------------|
| <b>Time frame: Since the initial planning of the work</b> |                                                                                                                                                                                |                                                                                              |                                                                                     |
| 1                                                         | All support for the present manuscript (e.g., funding, provision of study materials, medical writing, article processing charges, etc.)<br><b>No time limit for this item.</b> | None                                                                                         |                                                                                     |
|                                                           |                                                                                                                                                                                |                                                                                              |                                                                                     |
|                                                           |                                                                                                                                                                                |                                                                                              |                                                                                     |
|                                                           |                                                                                                                                                                                |                                                                                              |                                                                                     |
|                                                           |                                                                                                                                                                                |                                                                                              |                                                                                     |
|                                                           |                                                                                                                                                                                |                                                                                              |                                                                                     |
| <b>Time frame: past 36 months</b>                         |                                                                                                                                                                                |                                                                                              |                                                                                     |
| 2                                                         | Grants or contracts from any entity (if not indicated in item #1 above).                                                                                                       | None                                                                                         |                                                                                     |
|                                                           |                                                                                                                                                                                |                                                                                              |                                                                                     |
| 3                                                         | Royalties or licenses                                                                                                                                                          | None                                                                                         |                                                                                     |
|                                                           |                                                                                                                                                                                |                                                                                              |                                                                                     |
| 4                                                         | Consulting fees                                                                                                                                                                | None                                                                                         |                                                                                     |
|                                                           |                                                                                                                                                                                |                                                                                              |                                                                                     |

|    |                                                                                                              |      |  |
|----|--------------------------------------------------------------------------------------------------------------|------|--|
|    |                                                                                                              |      |  |
| 5  | Payment or honoraria for lectures, presentations, speakers bureaus, manuscript writing or educational events | None |  |
| 6  | Payment for expert testimony                                                                                 | None |  |
| 7  | Support for attending meetings and/or travel                                                                 | None |  |
| 8  | Patents planned, issued or pending                                                                           | None |  |
| 9  | Participation on a Data Safety Monitoring Board or Advisory Board                                            | None |  |
| 10 | Leadership or fiduciary role in other board, society, committee or advocacy group, paid or unpaid            | None |  |
| 11 | Stock or stock options                                                                                       | None |  |
| 12 | Receipt of equipment, materials, drugs, medical writing, gifts or other services                             | None |  |
| 13 | Other financial or non-financial interests                                                                   | None |  |

**Please summarize the above conflict of interest in the following box:**

|      |
|------|
| None |
|------|

**Please place an "X" next to the following statement to indicate your agreement:**

  X   I certify that I have answered every question and have not altered the wording of any of the questions on this

**form.**

## ICMJE DISCLOSURE FORM

Date: 13/12/2022  
 Your Name: Qianling Shi  
 Manuscript Title: The SUPER 2022 reporting guideline for suggested reporting of surgical technique  
 Manuscript number (if known): \_HBSN-22 509

In the interest of transparency, we ask you to disclose all relationships/activities/interests listed below that are related to the content of your manuscript. "Related" means any relation with for-profit or not-for-profit third parties whose interests may be affected by the content of the manuscript. Disclosure represents a commitment to transparency and does not necessarily indicate a bias. If you are in doubt about whether to list a relationship/activity/interest, it is preferable that you do so.

The following questions apply to the author's relationships/activities/interests as they relate to the **current manuscript only**.

The author's relationships/activities/interests should be **defined broadly**. For example, if your manuscript pertains to the epidemiology of hypertension, you should declare all relationships with manufacturers of antihypertensive medication, even if that medication is not mentioned in the manuscript.

In item #1 below, report all support for the work reported in this manuscript without time limit. For all other items, the time frame for disclosure is the past 36 months.

|                                                           |                                                                                                                                                                                | Name all entities with whom you have this relationship or indicate none (add rows as needed) | Specifications/Comments (e.g., if payments were made to you or to your institution) |
|-----------------------------------------------------------|--------------------------------------------------------------------------------------------------------------------------------------------------------------------------------|----------------------------------------------------------------------------------------------|-------------------------------------------------------------------------------------|
| <b>Time frame: Since the initial planning of the work</b> |                                                                                                                                                                                |                                                                                              |                                                                                     |
| 1                                                         | All support for the present manuscript (e.g., funding, provision of study materials, medical writing, article processing charges, etc.)<br><b>No time limit for this item.</b> | None                                                                                         |                                                                                     |
|                                                           |                                                                                                                                                                                |                                                                                              |                                                                                     |
|                                                           |                                                                                                                                                                                |                                                                                              |                                                                                     |
|                                                           |                                                                                                                                                                                |                                                                                              |                                                                                     |
|                                                           |                                                                                                                                                                                |                                                                                              |                                                                                     |
|                                                           |                                                                                                                                                                                |                                                                                              |                                                                                     |
|                                                           |                                                                                                                                                                                |                                                                                              |                                                                                     |
| <b>Time frame: past 36 months</b>                         |                                                                                                                                                                                |                                                                                              |                                                                                     |
| 2                                                         | Grants or contracts from any entity (if not indicated in item #1 above).                                                                                                       | None                                                                                         |                                                                                     |
|                                                           |                                                                                                                                                                                |                                                                                              |                                                                                     |
|                                                           |                                                                                                                                                                                |                                                                                              |                                                                                     |
| 3                                                         | Royalties or licenses                                                                                                                                                          | None                                                                                         |                                                                                     |
|                                                           |                                                                                                                                                                                |                                                                                              |                                                                                     |
|                                                           |                                                                                                                                                                                |                                                                                              |                                                                                     |
| 4                                                         | Consulting fees                                                                                                                                                                | None                                                                                         |                                                                                     |
|                                                           |                                                                                                                                                                                |                                                                                              |                                                                                     |
|                                                           |                                                                                                                                                                                |                                                                                              |                                                                                     |



|    |                                                                                                              |      |  |
|----|--------------------------------------------------------------------------------------------------------------|------|--|
| 5  | Payment or honoraria for lectures, presentations, speakers bureaus, manuscript writing or educational events | None |  |
|    |                                                                                                              |      |  |
|    |                                                                                                              |      |  |
| 6  | Payment for expert testimony                                                                                 | None |  |
|    |                                                                                                              |      |  |
|    |                                                                                                              |      |  |
| 7  | Support for attending meetings and/or travel                                                                 | None |  |
|    |                                                                                                              |      |  |
|    |                                                                                                              |      |  |
| 8  | Patents planned, issued or pending                                                                           | None |  |
|    |                                                                                                              |      |  |
|    |                                                                                                              |      |  |
| 9  | Participation on a Data Safety Monitoring Board or Advisory Board                                            | None |  |
|    |                                                                                                              |      |  |
|    |                                                                                                              |      |  |
| 10 | Leadership or fiduciary role in other board, society, committee or advocacy group, paid or unpaid            | None |  |
|    |                                                                                                              |      |  |
|    |                                                                                                              |      |  |
| 11 | Stock or stock options                                                                                       | None |  |
|    |                                                                                                              |      |  |
|    |                                                                                                              |      |  |
| 12 | Receipt of equipment, materials, drugs, medical writing, gifts or other services                             | None |  |
|    |                                                                                                              |      |  |
|    |                                                                                                              |      |  |
| 13 | Other financial or non-financial interests                                                                   | None |  |
|    |                                                                                                              |      |  |
|    |                                                                                                              |      |  |

**Please summarize the above conflict of interest in the following box:**

Qianling Shi had nothing to declare.

**Please place an "X" next to the following statement to indicate your agreement:**

**X I certify that I have answered every question and have not altered the wording of any of the questions on this form.**

## ICMJE DISCLOSURE FORM

**Date:** December 14<sup>th</sup>, 2022

**Your Name:** LEANDRO CARDODO BARCHI

**Manuscript Title:** The SUPER 2022 reporting guideline for suggested reporting of surgical technique

**Manuscript number (if known):** HBSN-22-509-R1

In the interest of transparency, we ask you to disclose all relationships/activities/interests listed below that are related to the content of your manuscript. "Related" means any relation with for-profit or not-for-profit third parties whose interests may be affected by the content of the manuscript. Disclosure represents a commitment to transparency and does not necessarily indicate a bias. If you are in doubt about whether to list a relationship/activity/interest, it is preferable that you do so.

The following questions apply to the author's relationships/activities/interests as they relate to the current manuscript only.

The author's relationships/activities/interests should be defined broadly. For example, if your manuscript pertains to the epidemiology of hypertension, you should declare all relationships with manufacturers of antihypertensive medication, even if that medication is not mentioned in the manuscript.

In item #1 below, report all support for the work reported in this manuscript without time limit. For all other items, the time frame for disclosure is the past 36 months.

|                                                           |                                                                                                                                                                                | Name all entities with whom you have this relationship or indicate none (add rows as needed) | Specifications/Comments (e.g., if payments were made to you or to your institution) |
|-----------------------------------------------------------|--------------------------------------------------------------------------------------------------------------------------------------------------------------------------------|----------------------------------------------------------------------------------------------|-------------------------------------------------------------------------------------|
| <b>Time frame: Since the initial planning of the work</b> |                                                                                                                                                                                |                                                                                              |                                                                                     |
| 1                                                         | All support for the present manuscript (e.g., funding, provision of study materials, medical writing, article processing charges, etc.)<br><b>No time limit for this item.</b> | None                                                                                         |                                                                                     |
|                                                           |                                                                                                                                                                                |                                                                                              |                                                                                     |
|                                                           |                                                                                                                                                                                |                                                                                              |                                                                                     |
|                                                           |                                                                                                                                                                                |                                                                                              |                                                                                     |
|                                                           |                                                                                                                                                                                |                                                                                              |                                                                                     |
|                                                           |                                                                                                                                                                                |                                                                                              |                                                                                     |
| <b>Time frame: past 36 months</b>                         |                                                                                                                                                                                |                                                                                              |                                                                                     |
| 2                                                         | Grants or contracts from any entity (if not indicated in item #1 above).                                                                                                       | None                                                                                         |                                                                                     |
|                                                           |                                                                                                                                                                                |                                                                                              |                                                                                     |
| 3                                                         | Royalties or licenses                                                                                                                                                          | None                                                                                         |                                                                                     |
|                                                           |                                                                                                                                                                                |                                                                                              |                                                                                     |
| 4                                                         | Consulting fees                                                                                                                                                                | None                                                                                         |                                                                                     |
|                                                           |                                                                                                                                                                                |                                                                                              |                                                                                     |
|                                                           |                                                                                                                                                                                |                                                                                              |                                                                                     |

|    |                                                                                                              |      |  |
|----|--------------------------------------------------------------------------------------------------------------|------|--|
| 5  | Payment or honoraria for lectures, presentations, speakers bureaus, manuscript writing or educational events | None |  |
|    |                                                                                                              |      |  |
|    |                                                                                                              |      |  |
| 6  | Payment for expert testimony                                                                                 | None |  |
|    |                                                                                                              |      |  |
|    |                                                                                                              |      |  |
| 7  | Support for attending meetings and/or travel                                                                 | None |  |
|    |                                                                                                              |      |  |
|    |                                                                                                              |      |  |
| 8  | Patents planned, issued or pending                                                                           | None |  |
|    |                                                                                                              |      |  |
|    |                                                                                                              |      |  |
| 9  | Participation on a Data Safety Monitoring Board or Advisory Board                                            | None |  |
|    |                                                                                                              |      |  |
|    |                                                                                                              |      |  |
| 10 | Leadership or fiduciary role in other board, society, committee or advocacy group, paid or unpaid            | None |  |
|    |                                                                                                              |      |  |
|    |                                                                                                              |      |  |
| 11 | Stock or stock options                                                                                       | None |  |
|    |                                                                                                              |      |  |
|    |                                                                                                              |      |  |
| 12 | Receipt of equipment, materials, drugs, medical writing, gifts or other services                             | None |  |
|    |                                                                                                              |      |  |
|    |                                                                                                              |      |  |
| 13 | Other financial or non-financial interests                                                                   | None |  |
|    |                                                                                                              |      |  |
|    |                                                                                                              |      |  |

Please summarize the above conflict of interest in the following box:

Please place an "X" next to the following statement to indicate your agreement:

**X** I, leandro barchi, certify that I have answered every question and have not altered the wording of any of the questions on this form.

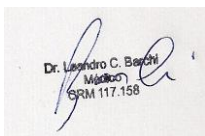

Dr. Leandro C. Barchi  
Médico  
CRM 117.158

## ICMJE DISCLOSURE FORM

**Date:** 13/12/2022

**Your Name** Marco Scarci

**Manuscript Title** The SUPER 2022 reporting guideline for suggested reporting of surgical technique"

**Manuscript number (if known):** \_\_\_\_\_

In the interest of transparency, we ask you to disclose all relationships/activities/interests listed below that are related to the content of your manuscript. "Related" means any relation with for-profit or not-for-profit third parties whose interests may be affected by the content of the manuscript. Disclosure represents a commitment to transparency and does not necessarily indicate a bias. If you are in doubt about whether to list a relationship/activity/interest, it is preferable that you do so.

The following questions apply to the author's relationships/activities/interests as they relate to the current manuscript only.

The author's relationships/activities/interests should be defined broadly. For example, if your manuscript pertains to the epidemiology of hypertension, you should declare all relationships with manufacturers of antihypertensive medication, even if that medication is not mentioned in the manuscript.

In item #1 below, report all support for the work reported in this manuscript without time limit. For all other items, the time frame for disclosure is the past 36 months.

|                                                           |                                                                                                                                                                                | Name all entities with whom you have this relationship or indicate none (add rows as needed) | Specifications/Comments (e.g., if payments were made to you or to your institution) |
|-----------------------------------------------------------|--------------------------------------------------------------------------------------------------------------------------------------------------------------------------------|----------------------------------------------------------------------------------------------|-------------------------------------------------------------------------------------|
| <b>Time frame: Since the initial planning of the work</b> |                                                                                                                                                                                |                                                                                              |                                                                                     |
| 1                                                         | All support for the present manuscript (e.g., funding, provision of study materials, medical writing, article processing charges, etc.)<br><b>No time limit for this item.</b> | None                                                                                         |                                                                                     |
|                                                           |                                                                                                                                                                                |                                                                                              |                                                                                     |
|                                                           |                                                                                                                                                                                |                                                                                              |                                                                                     |
|                                                           |                                                                                                                                                                                |                                                                                              |                                                                                     |
|                                                           |                                                                                                                                                                                |                                                                                              |                                                                                     |
|                                                           |                                                                                                                                                                                |                                                                                              |                                                                                     |
|                                                           |                                                                                                                                                                                |                                                                                              |                                                                                     |
| <b>Time frame: past 36 months</b>                         |                                                                                                                                                                                |                                                                                              |                                                                                     |
| 2                                                         | Grants or contracts from any entity (if not indicated in item #1 above).                                                                                                       | None                                                                                         |                                                                                     |
|                                                           |                                                                                                                                                                                |                                                                                              |                                                                                     |
|                                                           |                                                                                                                                                                                |                                                                                              |                                                                                     |
| 3                                                         | Royalties or licenses                                                                                                                                                          | None                                                                                         |                                                                                     |
|                                                           |                                                                                                                                                                                |                                                                                              |                                                                                     |
|                                                           |                                                                                                                                                                                |                                                                                              |                                                                                     |
| 4                                                         | Consulting fees                                                                                                                                                                | None                                                                                         |                                                                                     |
|                                                           |                                                                                                                                                                                |                                                                                              |                                                                                     |
|                                                           |                                                                                                                                                                                |                                                                                              |                                                                                     |

|    |                                                                                                              |      |  |
|----|--------------------------------------------------------------------------------------------------------------|------|--|
| 5  | Payment or honoraria for lectures, presentations, speakers bureaus, manuscript writing or educational events | None |  |
|    |                                                                                                              |      |  |
|    |                                                                                                              |      |  |
| 6  | Payment for expert testimony                                                                                 | None |  |
|    |                                                                                                              |      |  |
|    |                                                                                                              |      |  |
| 7  | Support for attending meetings and/or travel                                                                 | None |  |
|    |                                                                                                              |      |  |
|    |                                                                                                              |      |  |
| 8  | Patents planned, issued or pending                                                                           | None |  |
|    |                                                                                                              |      |  |
|    |                                                                                                              |      |  |
| 9  | Participation on a Data Safety Monitoring Board or Advisory Board                                            | None |  |
|    |                                                                                                              |      |  |
|    |                                                                                                              |      |  |
| 10 | Leadership or fiduciary role in other board, society, committee or advocacy group, paid or unpaid            | None |  |
|    |                                                                                                              |      |  |
|    |                                                                                                              |      |  |
| 11 | Stock or stock options                                                                                       | None |  |
|    |                                                                                                              |      |  |
|    |                                                                                                              |      |  |
| 12 | Receipt of equipment, materials, drugs, medical writing, gifts or other services                             | None |  |
|    |                                                                                                              |      |  |
|    |                                                                                                              |      |  |
| 13 | Other financial or non-financial interests                                                                   | None |  |
|    |                                                                                                              |      |  |
|    |                                                                                                              |      |  |

**Please summarize the above conflict of interest in the following box:**

**Please place an "X" next to the following statement to indicate your agreement:**

X  I certify that I have answered every question and have not altered the wording of any of the questions on this form.

## ICMJE DISCLOSURE FORM

Date: 13<sup>th</sup> Dec 2022

Your Name: Rene Horsleben Petersen

Manuscript Title: The SUPER 2022 reporting guideline for suggested reporting of surgical technique

Manuscript number (if known): HBSN-22-509-R1

In the interest of transparency, we ask you to disclose all relationships/activities/interests listed below that are related to the content of your manuscript. "Related" means any relation with for-profit or not-for-profit third parties whose interests may be affected by the content of the manuscript. Disclosure represents a commitment to transparency and does not necessarily indicate a bias. If you are in doubt about whether to list a relationship/activity/interest, it is preferable that you do so.

The following questions apply to the author's relationships/activities/interests as they relate to the current manuscript only.

The author's relationships/activities/interests should be defined broadly. For example, if your manuscript pertains to the epidemiology of hypertension, you should declare all relationships with manufacturers of antihypertensive medication, even if that medication is not mentioned in the manuscript.

In item #1 below, report all support for the work reported in this manuscript without time limit. For all other items, the time frame for disclosure is the past 36 months.

|                                                           |                                                                                                                                                                                | Name all entities with whom you have this relationship or indicate none (add rows as needed) | Specifications/Comments (e.g., if payments were made to you or to your institution) |
|-----------------------------------------------------------|--------------------------------------------------------------------------------------------------------------------------------------------------------------------------------|----------------------------------------------------------------------------------------------|-------------------------------------------------------------------------------------|
| <b>Time frame: Since the initial planning of the work</b> |                                                                                                                                                                                |                                                                                              |                                                                                     |
| 1                                                         | All support for the present manuscript (e.g., funding, provision of study materials, medical writing, article processing charges, etc.)<br><b>No time limit for this item.</b> | None                                                                                         |                                                                                     |
|                                                           |                                                                                                                                                                                |                                                                                              |                                                                                     |
|                                                           |                                                                                                                                                                                |                                                                                              |                                                                                     |
|                                                           |                                                                                                                                                                                |                                                                                              |                                                                                     |
|                                                           |                                                                                                                                                                                |                                                                                              |                                                                                     |
| <b>Time frame: past 36 months</b>                         |                                                                                                                                                                                |                                                                                              |                                                                                     |
| 2                                                         | Grants or contracts from any entity (if not indicated in item #1 above).                                                                                                       | None                                                                                         |                                                                                     |
|                                                           |                                                                                                                                                                                |                                                                                              |                                                                                     |
| 3                                                         | Royalties or licenses                                                                                                                                                          | None                                                                                         |                                                                                     |
|                                                           |                                                                                                                                                                                |                                                                                              |                                                                                     |
| 4                                                         | Consulting fees                                                                                                                                                                | None                                                                                         |                                                                                     |
|                                                           |                                                                                                                                                                                |                                                                                              |                                                                                     |

|    |                                                                                                              |                                            |                                                          |
|----|--------------------------------------------------------------------------------------------------------------|--------------------------------------------|----------------------------------------------------------|
| 5  | Payment or honoraria for lectures, presentations, speakers bureaus, manuscript writing or educational events | Medtronic<br>Medela<br>AstraZeneca<br>AMBU | Speaker fee<br>Speaker fee<br>Speaker fee<br>Speaker fee |
| 6  | Payment for expert testimony                                                                                 | None                                       |                                                          |
| 7  | Support for attending meetings and/or travel                                                                 | None                                       |                                                          |
| 8  | Patents planned, issued or pending                                                                           | None                                       |                                                          |
| 9  | Participation on a Data Safety Monitoring Board or Advisory Board                                            | None                                       |                                                          |
| 10 | Leadership or fiduciary role in other board, society, committee or advocacy group, paid or unpaid            | AstraZeneca<br>Roche<br>MSD                | Adv Board member<br>Adv Board member<br>Adv Board member |
| 11 | Stock or stock options                                                                                       | None                                       |                                                          |
| 12 | Receipt of equipment, materials, drugs, medical writing, gifts or other services                             | None                                       |                                                          |
| 13 | Other financial or non-financial interests                                                                   | None                                       |                                                          |

**Please summarize the above conflict of interest in the following box:**

|                                                                                                             |
|-------------------------------------------------------------------------------------------------------------|
| <p>Medtronic, AMBU, Medela, AstraZeneca: Speaker fee<br/>AstraZeneca, MSD, Roche: Advisory Board member</p> |
|-------------------------------------------------------------------------------------------------------------|

**Please place an "X" next to the following statement to indicate your agreement:**

**X   I certify that I have answered every question and have not altered the wording of any of the questions on this form.**

## ICMJE DISCLOSURE FORM

Date: 13<sup>th</sup> Dec 2022

Your Name: Calvin S.H. Ng

Manuscript Title: The SUPER 2022 reporting guideline for suggested reporting of surgical technique

Manuscript number (if known): HBSN-22-509-R1

In the interest of transparency, we ask you to disclose all relationships/activities/interests listed below that are related to the content of your manuscript. "Related" means any relation with for-profit or not-for-profit third parties whose interests may be affected by the content of the manuscript. Disclosure represents a commitment to transparency and does not necessarily indicate a bias. If you are in doubt about whether to list a relationship/activity/interest, it is preferable that you do so.

The following questions apply to the author's relationships/activities/interests as they relate to the current manuscript only.

The author's relationships/activities/interests should be defined broadly. For example, if your manuscript pertains to the epidemiology of hypertension, you should declare all relationships with manufacturers of antihypertensive medication, even if that medication is not mentioned in the manuscript.

In item #1 below, report all support for the work reported in this manuscript without time limit. For all other items, the time frame for disclosure is the past 36 months.

|                                                           |                                                                                                                                                                                | Name all entities with whom you have this relationship or indicate none (add rows as needed) | Specifications/Comments (e.g., if payments were made to you or to your institution) |
|-----------------------------------------------------------|--------------------------------------------------------------------------------------------------------------------------------------------------------------------------------|----------------------------------------------------------------------------------------------|-------------------------------------------------------------------------------------|
| <b>Time frame: Since the initial planning of the work</b> |                                                                                                                                                                                |                                                                                              |                                                                                     |
| 1                                                         | All support for the present manuscript (e.g., funding, provision of study materials, medical writing, article processing charges, etc.)<br><b>No time limit for this item.</b> | None                                                                                         |                                                                                     |
|                                                           |                                                                                                                                                                                |                                                                                              |                                                                                     |
|                                                           |                                                                                                                                                                                |                                                                                              |                                                                                     |
|                                                           |                                                                                                                                                                                |                                                                                              |                                                                                     |
|                                                           |                                                                                                                                                                                |                                                                                              |                                                                                     |
|                                                           |                                                                                                                                                                                |                                                                                              |                                                                                     |
| <b>Time frame: past 36 months</b>                         |                                                                                                                                                                                |                                                                                              |                                                                                     |
| 2                                                         | Grants or contracts from any entity (if not indicated in item #1 above).                                                                                                       | None                                                                                         |                                                                                     |
|                                                           |                                                                                                                                                                                |                                                                                              |                                                                                     |
| 3                                                         | Royalties or licenses                                                                                                                                                          | None                                                                                         |                                                                                     |
|                                                           |                                                                                                                                                                                |                                                                                              |                                                                                     |
| 4                                                         | Consulting fees                                                                                                                                                                | Medtronic                                                                                    | To me                                                                               |
|                                                           |                                                                                                                                                                                | Johnson & Johnson                                                                            | To me                                                                               |
|                                                           |                                                                                                                                                                                |                                                                                              |                                                                                     |



|    |                                                                                                              |      |  |
|----|--------------------------------------------------------------------------------------------------------------|------|--|
| 5  | Payment or honoraria for lectures, presentations, speakers bureaus, manuscript writing or educational events | None |  |
|    |                                                                                                              |      |  |
|    |                                                                                                              |      |  |
| 6  | Payment for expert testimony                                                                                 | None |  |
|    |                                                                                                              |      |  |
|    |                                                                                                              |      |  |
| 7  | Support for attending meetings and/or travel                                                                 | None |  |
|    |                                                                                                              |      |  |
|    |                                                                                                              |      |  |
| 8  | Patents planned, issued or pending                                                                           | None |  |
|    |                                                                                                              |      |  |
|    |                                                                                                              |      |  |
| 9  | Participation on a Data Safety Monitoring Board or Advisory Board                                            | None |  |
|    |                                                                                                              |      |  |
|    |                                                                                                              |      |  |
| 10 | Leadership or fiduciary role in other board, society, committee or advocacy group, paid or unpaid            | None |  |
|    |                                                                                                              |      |  |
|    |                                                                                                              |      |  |
| 11 | Stock or stock options                                                                                       | None |  |
|    |                                                                                                              |      |  |
|    |                                                                                                              |      |  |
| 12 | Receipt of equipment, materials, drugs, medical writing, gifts or other services                             | None |  |
|    |                                                                                                              |      |  |
|    |                                                                                                              |      |  |
| 13 | Other financial or non-financial interests                                                                   | None |  |
|    |                                                                                                              |      |  |
|    |                                                                                                              |      |  |

**Please summarize the above conflict of interest in the following box:**

Medtronic & Johnson and Johnson have provided consulting fees to me.

**Please place an "X" next to the following statement to indicate your agreement:**

**X I certify that I have answered every question and have not altered the wording of any of the questions on this form.**

## ICMJE DISCLOSURE FORM

Date: 26<sup>th</sup> Dec 2022  
 Your Name: Steven Hochwald  
 Manuscript Title: The SUPER 2022 reporting guideline for suggested reporting of surgical technique  
 Manuscript number (if known): HBSN-22-509-R1

In the interest of transparency, we ask you to disclose all relationships/activities/interests listed below that are related to the content of your manuscript. "Related" means any relation with for-profit or not-for-profit third parties whose interests may be affected by the content of the manuscript. Disclosure represents a commitment to transparency and does not necessarily indicate a bias. If you are in doubt about whether to list a relationship/activity/interest, it is preferable that you do so.

The following questions apply to the author's relationships/activities/interests as they relate to the current manuscript only.

The author's relationships/activities/interests should be defined broadly. For example, if your manuscript pertains to the epidemiology of hypertension, you should declare all relationships with manufacturers of antihypertensive medication, even if that medication is not mentioned in the manuscript.

In item #1 below, report all support for the work reported in this manuscript without time limit. For all other items, the time frame for disclosure is the past 36 months.

|                                                           |                                                                                                                                                                                | Name all entities with whom you have this relationship or indicate none (add rows as needed) | Specifications/Comments (e.g., if payments were made to you or to your institution) |
|-----------------------------------------------------------|--------------------------------------------------------------------------------------------------------------------------------------------------------------------------------|----------------------------------------------------------------------------------------------|-------------------------------------------------------------------------------------|
| <b>Time frame: Since the initial planning of the work</b> |                                                                                                                                                                                |                                                                                              |                                                                                     |
| 1                                                         | All support for the present manuscript (e.g., funding, provision of study materials, medical writing, article processing charges, etc.)<br><b>No time limit for this item.</b> | None                                                                                         |                                                                                     |
|                                                           |                                                                                                                                                                                |                                                                                              |                                                                                     |
|                                                           |                                                                                                                                                                                |                                                                                              |                                                                                     |
|                                                           |                                                                                                                                                                                |                                                                                              |                                                                                     |
|                                                           |                                                                                                                                                                                |                                                                                              |                                                                                     |
| <b>Time frame: past 36 months</b>                         |                                                                                                                                                                                |                                                                                              |                                                                                     |
| 2                                                         | Grants or contracts from any entity (if not indicated in item #1 above).                                                                                                       | None                                                                                         |                                                                                     |
|                                                           |                                                                                                                                                                                |                                                                                              |                                                                                     |
| 3                                                         | Royalties or licenses                                                                                                                                                          | None                                                                                         |                                                                                     |
|                                                           |                                                                                                                                                                                |                                                                                              |                                                                                     |
| 4                                                         | Consulting fees                                                                                                                                                                | None                                                                                         |                                                                                     |
|                                                           |                                                                                                                                                                                |                                                                                              |                                                                                     |
|                                                           |                                                                                                                                                                                |                                                                                              |                                                                                     |

|    |                                                                                                              |      |  |
|----|--------------------------------------------------------------------------------------------------------------|------|--|
| 5  | Payment or honoraria for lectures, presentations, speakers bureaus, manuscript writing or educational events | None |  |
| 6  | Payment for expert testimony                                                                                 | None |  |
| 7  | Support for attending meetings and/or travel                                                                 | None |  |
| 8  | Patents planned, issued or pending                                                                           | None |  |
| 9  | Participation on a Data Safety Monitoring Board or Advisory Board                                            | None |  |
| 10 | Leadership or fiduciary role in other board, society, committee or advocacy group, paid or unpaid            | None |  |
| 11 | Stock or stock options                                                                                       | None |  |
| 12 | Receipt of equipment, materials, drugs, medical writing, gifts or other services                             | None |  |
| 13 | Other financial or non-financial interests                                                                   | None |  |

**Please summarize the above conflict of interest in the following box:**

none

**Please place an "X" next to the following statement to indicate your agreement:**

**I certify that I have answered every question and have not altered the wording of any of the questions on this form.**

## ICMJE DISCLOSURE FORM

Date: 13<sup>th</sup> Dec. 2022.

Your Name: Ryuichi Waseda

Manuscript Title: "The SUPER 2022 reporting guideline for suggested reporting of surgical technique"

Manuscript number (if known): HBSN-22-509-R1

In the interest of transparency, we ask you to disclose all relationships/activities/interests listed below that are related to the content of your manuscript. "Related" means any relation with for-profit or not-for-profit third parties whose interests may be affected by the content of the manuscript. Disclosure represents a commitment to transparency and does not necessarily indicate a bias. If you are in doubt about whether to list a relationship/activity/interest, it is preferable that you do so.

The following questions apply to the author's relationships/activities/interests as they relate to the current manuscript only.

The author's relationships/activities/interests should be defined broadly. For example, if your manuscript pertains to the epidemiology of hypertension, you should declare all relationships with manufacturers of antihypertensive medication, even if that medication is not mentioned in the manuscript.

In item #1 below, report all support for the work reported in this manuscript without time limit. For all other items, the time frame for disclosure is the past 36 months.

|                                                           |                                                                                                                                                                                | Name all entities with whom you have this relationship or indicate none (add rows as needed) | Specifications/Comments (e.g., if payments were made to you or to your institution) |
|-----------------------------------------------------------|--------------------------------------------------------------------------------------------------------------------------------------------------------------------------------|----------------------------------------------------------------------------------------------|-------------------------------------------------------------------------------------|
| <b>Time frame: Since the initial planning of the work</b> |                                                                                                                                                                                |                                                                                              |                                                                                     |
| 1                                                         | All support for the present manuscript (e.g., funding, provision of study materials, medical writing, article processing charges, etc.)<br><b>No time limit for this item.</b> | None                                                                                         |                                                                                     |
|                                                           |                                                                                                                                                                                |                                                                                              |                                                                                     |
|                                                           |                                                                                                                                                                                |                                                                                              |                                                                                     |
|                                                           |                                                                                                                                                                                |                                                                                              |                                                                                     |
|                                                           |                                                                                                                                                                                |                                                                                              |                                                                                     |
|                                                           |                                                                                                                                                                                |                                                                                              |                                                                                     |
| <b>Time frame: past 36 months</b>                         |                                                                                                                                                                                |                                                                                              |                                                                                     |
| 2                                                         | Grants or contracts from any entity (if not indicated in item #1 above).                                                                                                       | None                                                                                         |                                                                                     |
|                                                           |                                                                                                                                                                                |                                                                                              |                                                                                     |
|                                                           |                                                                                                                                                                                |                                                                                              |                                                                                     |
| 3                                                         | Royalties or licenses                                                                                                                                                          | None                                                                                         |                                                                                     |
|                                                           |                                                                                                                                                                                |                                                                                              |                                                                                     |
|                                                           |                                                                                                                                                                                |                                                                                              |                                                                                     |
| 4                                                         | Consulting fees                                                                                                                                                                | None                                                                                         |                                                                                     |
|                                                           |                                                                                                                                                                                |                                                                                              |                                                                                     |
|                                                           |                                                                                                                                                                                |                                                                                              |                                                                                     |

|    |                                                                                                              |      |  |
|----|--------------------------------------------------------------------------------------------------------------|------|--|
| 5  | Payment or honoraria for lectures, presentations, speakers bureaus, manuscript writing or educational events | None |  |
|    |                                                                                                              |      |  |
|    |                                                                                                              |      |  |
| 6  | Payment for expert testimony                                                                                 | None |  |
|    |                                                                                                              |      |  |
|    |                                                                                                              |      |  |
| 7  | Support for attending meetings and/or travel                                                                 | None |  |
|    |                                                                                                              |      |  |
|    |                                                                                                              |      |  |
| 8  | Patents planned, issued or pending                                                                           | None |  |
|    |                                                                                                              |      |  |
|    |                                                                                                              |      |  |
| 9  | Participation on a Data Safety Monitoring Board or Advisory Board                                            | None |  |
|    |                                                                                                              |      |  |
|    |                                                                                                              |      |  |
| 10 | Leadership or fiduciary role in other board, society, committee or advocacy group, paid or unpaid            | None |  |
|    |                                                                                                              |      |  |
|    |                                                                                                              |      |  |
| 11 | Stock or stock options                                                                                       | None |  |
|    |                                                                                                              |      |  |
|    |                                                                                                              |      |  |
| 12 | Receipt of equipment, materials, drugs, medical writing, gifts or other services                             | None |  |
|    |                                                                                                              |      |  |
|    |                                                                                                              |      |  |
| 13 | Other financial or non-financial interests                                                                   | None |  |
|    |                                                                                                              |      |  |
|    |                                                                                                              |      |  |

**Please summarize the above conflict of interest in the following box:**

|                             |
|-----------------------------|
| I have nothing to disclose. |
|-----------------------------|

**Please place an "X" next to the following statement to indicate your agreement:**

**I certify that I have answered every question and have not altered the wording of any of the questions on this form.**

## ICMJE DISCLOSURE FORM

**Date:** 13<sup>th</sup> DECEMBER 2022

**Your Name:** FABIO DAVOLI

**Manuscript Title:** The SUPER 2022 reporting guideline for suggested reporting of surgical technique

**Manuscript number (if known):** HBSN-22-509-R1

In the interest of transparency, we ask you to disclose all relationships/activities/interests listed below that are related to the content of your manuscript. "Related" means any relation with for-profit or not-for-profit third parties whose interests may be affected by the content of the manuscript. Disclosure represents a commitment to transparency and does not necessarily indicate a bias. If you are in doubt about whether to list a relationship/activity/interest, it is preferable that you do so.

The following questions apply to the author's relationships/activities/interests as they relate to the current manuscript only.

The author's relationships/activities/interests should be defined broadly. For example, if your manuscript pertains to the epidemiology of hypertension, you should declare all relationships with manufacturers of antihypertensive medication, even if that medication is not mentioned in the manuscript.

In item #1 below, report all support for the work reported in this manuscript without time limit. For all other items, the time frame for disclosure is the past 36 months.

|                                                           |                                                                                                                                                                                | Name all entities with whom you have this relationship or indicate none (add rows as needed) | Specifications/Comments (e.g., if payments were made to you or to your institution) |
|-----------------------------------------------------------|--------------------------------------------------------------------------------------------------------------------------------------------------------------------------------|----------------------------------------------------------------------------------------------|-------------------------------------------------------------------------------------|
| <b>Time frame: Since the initial planning of the work</b> |                                                                                                                                                                                |                                                                                              |                                                                                     |
| 1                                                         | All support for the present manuscript (e.g., funding, provision of study materials, medical writing, article processing charges, etc.)<br><b>No time limit for this item.</b> | None                                                                                         |                                                                                     |
|                                                           |                                                                                                                                                                                |                                                                                              |                                                                                     |
|                                                           |                                                                                                                                                                                |                                                                                              |                                                                                     |
|                                                           |                                                                                                                                                                                |                                                                                              |                                                                                     |
|                                                           |                                                                                                                                                                                |                                                                                              |                                                                                     |
|                                                           |                                                                                                                                                                                |                                                                                              |                                                                                     |
| <b>Time frame: past 36 months</b>                         |                                                                                                                                                                                |                                                                                              |                                                                                     |
| 2                                                         | Grants or contracts from any entity (if not indicated in item #1 above).                                                                                                       | None                                                                                         |                                                                                     |
|                                                           |                                                                                                                                                                                |                                                                                              |                                                                                     |
| 3                                                         | Royalties or licenses                                                                                                                                                          | None                                                                                         |                                                                                     |
|                                                           |                                                                                                                                                                                |                                                                                              |                                                                                     |
| 4                                                         | Consulting fees                                                                                                                                                                | None                                                                                         |                                                                                     |
|                                                           |                                                                                                                                                                                |                                                                                              |                                                                                     |
|                                                           |                                                                                                                                                                                |                                                                                              |                                                                                     |

|    |                                                                                                              |      |  |
|----|--------------------------------------------------------------------------------------------------------------|------|--|
| 5  | Payment or honoraria for lectures, presentations, speakers bureaus, manuscript writing or educational events | None |  |
|    |                                                                                                              |      |  |
|    |                                                                                                              |      |  |
| 6  | Payment for expert testimony                                                                                 | None |  |
|    |                                                                                                              |      |  |
|    |                                                                                                              |      |  |
| 7  | Support for attending meetings and/or travel                                                                 | None |  |
|    |                                                                                                              |      |  |
|    |                                                                                                              |      |  |
| 8  | Patents planned, issued or pending                                                                           | None |  |
|    |                                                                                                              |      |  |
|    |                                                                                                              |      |  |
| 9  | Participation on a Data Safety Monitoring Board or Advisory Board                                            | None |  |
|    |                                                                                                              |      |  |
|    |                                                                                                              |      |  |
| 10 | Leadership or fiduciary role in other board, society, committee or advocacy group, paid or unpaid            | None |  |
|    |                                                                                                              |      |  |
|    |                                                                                                              |      |  |
| 11 | Stock or stock options                                                                                       | None |  |
|    |                                                                                                              |      |  |
|    |                                                                                                              |      |  |
| 12 | Receipt of equipment, materials, drugs, medical writing, gifts or other services                             | None |  |
|    |                                                                                                              |      |  |
|    |                                                                                                              |      |  |
| 13 | Other financial or non-financial interests                                                                   | None |  |
|    |                                                                                                              |      |  |
|    |                                                                                                              |      |  |

**Please summarize the above conflict of interest in the following box:**

|      |
|------|
| NONE |
|------|

**Please place an "X" next to the following statement to indicate your agreement:**

**X I certify that I have answered every question and have not altered the wording of any of the questions on this form.**

## ICMJE DISCLOSURE FORM

Date: December 13, 2022

Your Name: Robert Fruscio

Manuscript Title: The SUPER 2022 reporting guideline for suggested reporting of surgical technique

Manuscript number (if known): HBSN-22-509-R1

In the interest of transparency, we ask you to disclose all relationships/activities/interests listed below that are related to the content of your manuscript. "Related" means any relation with for-profit or not-for-profit third parties whose interests may be affected by the content of the manuscript. Disclosure represents a commitment to transparency and does not necessarily indicate a bias. If you are in doubt about whether to list a relationship/activity/interest, it is preferable that you do so.

The following questions apply to the author's relationships/activities/interests as they relate to the current manuscript only.

The author's relationships/activities/interests should be defined broadly. For example, if your manuscript pertains to the epidemiology of hypertension, you should declare all relationships with manufacturers of antihypertensive medication, even if that medication is not mentioned in the manuscript.

In item #1 below, report all support for the work reported in this manuscript without time limit. For all other items, the time frame for disclosure is the past 36 months.

|                                                           |                                                                                                                                                                                | Name all entities with whom you have this relationship or indicate none (add rows as needed) | Specifications/Comments (e.g., if payments were made to you or to your institution) |
|-----------------------------------------------------------|--------------------------------------------------------------------------------------------------------------------------------------------------------------------------------|----------------------------------------------------------------------------------------------|-------------------------------------------------------------------------------------|
| <b>Time frame: Since the initial planning of the work</b> |                                                                                                                                                                                |                                                                                              |                                                                                     |
| 1                                                         | All support for the present manuscript (e.g., funding, provision of study materials, medical writing, article processing charges, etc.)<br><b>No time limit for this item.</b> | None                                                                                         |                                                                                     |
|                                                           |                                                                                                                                                                                |                                                                                              |                                                                                     |
|                                                           |                                                                                                                                                                                |                                                                                              |                                                                                     |
|                                                           |                                                                                                                                                                                |                                                                                              |                                                                                     |
|                                                           |                                                                                                                                                                                |                                                                                              |                                                                                     |
|                                                           |                                                                                                                                                                                |                                                                                              |                                                                                     |
| <b>Time frame: past 36 months</b>                         |                                                                                                                                                                                |                                                                                              |                                                                                     |
| 2                                                         | Grants or contracts from any entity (if not indicated in item #1 above).                                                                                                       | None                                                                                         |                                                                                     |
|                                                           |                                                                                                                                                                                |                                                                                              |                                                                                     |
| 3                                                         | Royalties or licenses                                                                                                                                                          | None                                                                                         |                                                                                     |
|                                                           |                                                                                                                                                                                |                                                                                              |                                                                                     |
| 4                                                         | Consulting fees                                                                                                                                                                | None                                                                                         |                                                                                     |
|                                                           |                                                                                                                                                                                |                                                                                              |                                                                                     |
| 5                                                         | Payment or honoraria for lectures, presentations,                                                                                                                              | None                                                                                         |                                                                                     |
|                                                           |                                                                                                                                                                                |                                                                                              |                                                                                     |



|    |                                                                                                   |      |  |
|----|---------------------------------------------------------------------------------------------------|------|--|
|    | speakers bureaus, manuscript writing or educational events                                        |      |  |
| 6  | Payment for expert testimony                                                                      | None |  |
|    |                                                                                                   |      |  |
|    |                                                                                                   |      |  |
| 7  | Support for attending meetings and/or travel                                                      | None |  |
|    |                                                                                                   |      |  |
|    |                                                                                                   |      |  |
| 8  | Patents planned, issued or pending                                                                | None |  |
|    |                                                                                                   |      |  |
|    |                                                                                                   |      |  |
| 9  | Participation on a Data Safety Monitoring Board or Advisory Board                                 | None |  |
|    |                                                                                                   |      |  |
|    |                                                                                                   |      |  |
| 10 | Leadership or fiduciary role in other board, society, committee or advocacy group, paid or unpaid | None |  |
|    |                                                                                                   |      |  |
|    |                                                                                                   |      |  |
| 11 | Stock or stock options                                                                            | None |  |
|    |                                                                                                   |      |  |
|    |                                                                                                   |      |  |
| 12 | Receipt of equipment, materials, drugs, medical writing, gifts or other services                  | None |  |
|    |                                                                                                   |      |  |
|    |                                                                                                   |      |  |
| 13 | Other financial or non-financial interests                                                        | None |  |
|    |                                                                                                   |      |  |
|    |                                                                                                   |      |  |

Please summarize the above conflict of interest in the following box:

No conflict of interest to disclose

Please place an "X" next to the following statement to indicate your agreement:

I certify that I have answered every question and have not altered the wording of any of the questions on this form.



## ICMJE DISCLOSURE FORM

Date: 26<sup>th</sup> Dec 2022  
 Your Name: Giovanni Battista Levi Sandri  
 Manuscript Title: The SUPER 2022 reporting guideline for suggested reporting of surgical technique  
 Manuscript number (if known): HBSN-22-509-R1

In the interest of transparency, we ask you to disclose all relationships/activities/interests listed below that are related to the content of your manuscript. "Related" means any relation with for-profit or not-for-profit third parties whose interests may be affected by the content of the manuscript. Disclosure represents a commitment to transparency and does not necessarily indicate a bias. If you are in doubt about whether to list a relationship/activity/interest, it is preferable that you do so.

The following questions apply to the author's relationships/activities/interests as they relate to the current manuscript only.

The author's relationships/activities/interests should be defined broadly. For example, if your manuscript pertains to the epidemiology of hypertension, you should declare all relationships with manufacturers of antihypertensive medication, even if that medication is not mentioned in the manuscript.

In item #1 below, report all support for the work reported in this manuscript without time limit. For all other items, the time frame for disclosure is the past 36 months.

|                                                           |                                                                                                                                                                                | Name all entities with whom you have this relationship or indicate none (add rows as needed) | Specifications/Comments (e.g., if payments were made to you or to your institution) |
|-----------------------------------------------------------|--------------------------------------------------------------------------------------------------------------------------------------------------------------------------------|----------------------------------------------------------------------------------------------|-------------------------------------------------------------------------------------|
| <b>Time frame: Since the initial planning of the work</b> |                                                                                                                                                                                |                                                                                              |                                                                                     |
| 1                                                         | All support for the present manuscript (e.g., funding, provision of study materials, medical writing, article processing charges, etc.)<br><b>No time limit for this item.</b> | None                                                                                         |                                                                                     |
|                                                           |                                                                                                                                                                                |                                                                                              |                                                                                     |
|                                                           |                                                                                                                                                                                |                                                                                              |                                                                                     |
|                                                           |                                                                                                                                                                                |                                                                                              |                                                                                     |
|                                                           |                                                                                                                                                                                |                                                                                              |                                                                                     |
| <b>Time frame: past 36 months</b>                         |                                                                                                                                                                                |                                                                                              |                                                                                     |
| 2                                                         | Grants or contracts from any entity (if not indicated in item #1 above).                                                                                                       | None                                                                                         |                                                                                     |
|                                                           |                                                                                                                                                                                |                                                                                              |                                                                                     |
| 3                                                         | Royalties or licenses                                                                                                                                                          | None                                                                                         |                                                                                     |
|                                                           |                                                                                                                                                                                |                                                                                              |                                                                                     |
| 4                                                         | Consulting fees                                                                                                                                                                | None                                                                                         |                                                                                     |
|                                                           |                                                                                                                                                                                |                                                                                              |                                                                                     |
|                                                           |                                                                                                                                                                                |                                                                                              |                                                                                     |

|    |                                                                                                              |      |  |
|----|--------------------------------------------------------------------------------------------------------------|------|--|
| 5  | Payment or honoraria for lectures, presentations, speakers bureaus, manuscript writing or educational events | None |  |
| 6  | Payment for expert testimony                                                                                 | None |  |
| 7  | Support for attending meetings and/or travel                                                                 | None |  |
| 8  | Patents planned, issued or pending                                                                           | None |  |
| 9  | Participation on a Data Safety Monitoring Board or Advisory Board                                            | None |  |
| 10 | Leadership or fiduciary role in other board, society, committee or advocacy group, paid or unpaid            | None |  |
| 11 | Stock or stock options                                                                                       | None |  |
| 12 | Receipt of equipment, materials, drugs, medical writing, gifts or other services                             | None |  |
| 13 | Other financial or non-financial interests                                                                   | None |  |

**Please summarize the above conflict of interest in the following box:**

none

**Please place an "X" next to the following statement to indicate your agreement:**

**I certify that I have answered every question and have not altered the wording of any of the questions on this form.**

## ICMJE DISCLOSURE FORM

**Date:** 13<sup>th</sup> DECEMBER 2022

**Your Name:** GONZALEZ Michel

**Manuscript Title:** The SUPER 2022 reporting guideline for suggested reporting of surgical technique

**Manuscript number (if known):** HBSN-22-509-R1

In the interest of transparency, we ask you to disclose all relationships/activities/interests listed below that are related to the content of your manuscript. "Related" means any relation with for-profit or not-for-profit third parties whose interests may be affected by the content of the manuscript. Disclosure represents a commitment to transparency and does not necessarily indicate a bias. If you are in doubt about whether to list a relationship/activity/interest, it is preferable that you do so.

The following questions apply to the author's relationships/activities/interests as they relate to the current manuscript only.

The author's relationships/activities/interests should be defined broadly. For example, if your manuscript pertains to the epidemiology of hypertension, you should declare all relationships with manufacturers of antihypertensive medication, even if that medication is not mentioned in the manuscript.

In item #1 below, report all support for the work reported in this manuscript without time limit. For all other items, the time frame for disclosure is the past 36 months.

|                                                           |                                                                                                                                                                                | Name all entities with whom you have this relationship or indicate none (add rows as needed) | Specifications/Comments (e.g., if payments were made to you or to your institution) |
|-----------------------------------------------------------|--------------------------------------------------------------------------------------------------------------------------------------------------------------------------------|----------------------------------------------------------------------------------------------|-------------------------------------------------------------------------------------|
| <b>Time frame: Since the initial planning of the work</b> |                                                                                                                                                                                |                                                                                              |                                                                                     |
| 1                                                         | All support for the present manuscript (e.g., funding, provision of study materials, medical writing, article processing charges, etc.)<br><b>No time limit for this item.</b> | None                                                                                         |                                                                                     |
|                                                           |                                                                                                                                                                                |                                                                                              |                                                                                     |
|                                                           |                                                                                                                                                                                |                                                                                              |                                                                                     |
|                                                           |                                                                                                                                                                                |                                                                                              |                                                                                     |
|                                                           |                                                                                                                                                                                |                                                                                              |                                                                                     |
|                                                           |                                                                                                                                                                                |                                                                                              |                                                                                     |
| <b>Time frame: past 36 months</b>                         |                                                                                                                                                                                |                                                                                              |                                                                                     |
| 2                                                         | Grants or contracts from any entity (if not indicated in item #1 above).                                                                                                       | None                                                                                         |                                                                                     |
|                                                           |                                                                                                                                                                                |                                                                                              |                                                                                     |
| 3                                                         | Royalties or licenses                                                                                                                                                          | None                                                                                         |                                                                                     |
|                                                           |                                                                                                                                                                                |                                                                                              |                                                                                     |
| 4                                                         | Consulting fees                                                                                                                                                                | None                                                                                         |                                                                                     |
|                                                           |                                                                                                                                                                                |                                                                                              |                                                                                     |
|                                                           |                                                                                                                                                                                |                                                                                              |                                                                                     |

|    |                                                                                                              |      |  |
|----|--------------------------------------------------------------------------------------------------------------|------|--|
| 5  | Payment or honoraria for lectures, presentations, speakers bureaus, manuscript writing or educational events | None |  |
|    |                                                                                                              |      |  |
|    |                                                                                                              |      |  |
| 6  | Payment for expert testimony                                                                                 | None |  |
|    |                                                                                                              |      |  |
|    |                                                                                                              |      |  |
| 7  | Support for attending meetings and/or travel                                                                 | None |  |
|    |                                                                                                              |      |  |
|    |                                                                                                              |      |  |
| 8  | Patents planned, issued or pending                                                                           | None |  |
|    |                                                                                                              |      |  |
|    |                                                                                                              |      |  |
| 9  | Participation on a Data Safety Monitoring Board or Advisory Board                                            | None |  |
|    |                                                                                                              |      |  |
|    |                                                                                                              |      |  |
| 10 | Leadership or fiduciary role in other board, society, committee or advocacy group, paid or unpaid            | None |  |
|    |                                                                                                              |      |  |
|    |                                                                                                              |      |  |
| 11 | Stock or stock options                                                                                       | None |  |
|    |                                                                                                              |      |  |
|    |                                                                                                              |      |  |
| 12 | Receipt of equipment, materials, drugs, medical writing, gifts or other services                             | None |  |
|    |                                                                                                              |      |  |
|    |                                                                                                              |      |  |
| 13 | Other financial or non-financial interests                                                                   | None |  |
|    |                                                                                                              |      |  |
|    |                                                                                                              |      |  |

**Please summarize the above conflict of interest in the following box:**

|      |
|------|
| NONE |
|------|

**Please place an "X" next to the following statement to indicate your agreement:**

**X I certify that I have answered every question and have not altered the wording of any of the questions on this form.**

## ICMJE DISCLOSURE FORM

Date: December 14, 2022  
 Your Name: Benjamin Wei, MD  
 Manuscript Title: The SUPER 2022 reporting guideline for suggested reporting of surgical technique  
 Manuscript number (if known): HPSN-22-509-R1

In the interest of transparency, we ask you to disclose all relationships/activities/interests listed below that are related to the content of your manuscript. "Related" means any relation with for-profit or not-for-profit third parties whose interests may be affected by the content of the manuscript. Disclosure represents a commitment to transparency and does not necessarily indicate a bias. If you are in doubt about whether to list a relationship/activity/interest, it is preferable that you do so.

The following questions apply to the author's relationships/activities/interests as they relate to the current manuscript only.

The author's relationships/activities/interests should be defined broadly. For example, if your manuscript pertains to the epidemiology of hypertension, you should declare all relationships with manufacturers of antihypertensive medication, even if that medication is not mentioned in the manuscript.

In item #1 below, report all support for the work reported in this manuscript without time limit. For all other items, the time frame for disclosure is the past 36 months.

|                                                           |                                                                                                                                                                                | Name all entities with whom you have this relationship or indicate none (add rows as needed) | Specifications/Comments (e.g., if payments were made to you or to your institution) |
|-----------------------------------------------------------|--------------------------------------------------------------------------------------------------------------------------------------------------------------------------------|----------------------------------------------------------------------------------------------|-------------------------------------------------------------------------------------|
| <b>Time frame: Since the initial planning of the work</b> |                                                                                                                                                                                |                                                                                              |                                                                                     |
| 1                                                         | All support for the present manuscript (e.g., funding, provision of study materials, medical writing, article processing charges, etc.)<br><b>No time limit for this item.</b> | None                                                                                         |                                                                                     |
|                                                           |                                                                                                                                                                                |                                                                                              |                                                                                     |
|                                                           |                                                                                                                                                                                |                                                                                              |                                                                                     |
|                                                           |                                                                                                                                                                                |                                                                                              |                                                                                     |
|                                                           |                                                                                                                                                                                |                                                                                              |                                                                                     |
|                                                           |                                                                                                                                                                                |                                                                                              |                                                                                     |
| <b>Time frame: past 36 months</b>                         |                                                                                                                                                                                |                                                                                              |                                                                                     |
| 2                                                         | Grants or contracts from any entity (if not indicated in item #1 above).                                                                                                       | None                                                                                         |                                                                                     |
|                                                           |                                                                                                                                                                                |                                                                                              |                                                                                     |
| 3                                                         | Royalties or licenses                                                                                                                                                          | None                                                                                         |                                                                                     |
|                                                           |                                                                                                                                                                                |                                                                                              |                                                                                     |
| 4                                                         | Consulting fees                                                                                                                                                                | None                                                                                         |                                                                                     |
|                                                           |                                                                                                                                                                                |                                                                                              |                                                                                     |
|                                                           |                                                                                                                                                                                |                                                                                              |                                                                                     |

|    |                                                                                                              |      |  |
|----|--------------------------------------------------------------------------------------------------------------|------|--|
| 5  | Payment or honoraria for lectures, presentations, speakers bureaus, manuscript writing or educational events | None |  |
|    |                                                                                                              |      |  |
|    |                                                                                                              |      |  |
| 6  | Payment for expert testimony                                                                                 | None |  |
|    |                                                                                                              |      |  |
|    |                                                                                                              |      |  |
| 7  | Support for attending meetings and/or travel                                                                 | None |  |
|    |                                                                                                              |      |  |
|    |                                                                                                              |      |  |
| 8  | Patents planned, issued or pending                                                                           | None |  |
|    |                                                                                                              |      |  |
|    |                                                                                                              |      |  |
| 9  | Participation on a Data Safety Monitoring Board or Advisory Board                                            | None |  |
|    |                                                                                                              |      |  |
|    |                                                                                                              |      |  |
| 10 | Leadership or fiduciary role in other board, society, committee or advocacy group, paid or unpaid            | None |  |
|    |                                                                                                              |      |  |
|    |                                                                                                              |      |  |
| 11 | Stock or stock options                                                                                       | None |  |
|    |                                                                                                              |      |  |
|    |                                                                                                              |      |  |
| 12 | Receipt of equipment, materials, drugs, medical writing, gifts or other services                             | None |  |
|    |                                                                                                              |      |  |
|    |                                                                                                              |      |  |
| 13 | Other financial or non-financial interests                                                                   | None |  |
|    |                                                                                                              |      |  |
|    |                                                                                                              |      |  |

**Please summarize the above conflict of interest in the following box:**

**Please place an "X" next to the following statement to indicate your agreement:**

X  I certify that I have answered every question and have not altered the wording of any of the questions on this form.

## ICMJE DISCLOSURE FORM

Date: 26<sup>th</sup> Dec 2022  
 Your Name: Guillaume Piessen  
 Manuscript Title: The SUPER 2022 reporting guideline for suggested reporting of surgical technique  
 Manuscript number (if known): HBSN-22-509-R1

In the interest of transparency, we ask you to disclose all relationships/activities/interests listed below that are related to the content of your manuscript. “Related” means any relation with for-profit or not-for-profit third parties whose interests may be affected by the content of the manuscript. Disclosure represents a commitment to transparency and does not necessarily indicate a bias. If you are in doubt about whether to list a relationship/activity/interest, it is preferable that you do so.

The following questions apply to the author’s relationships/activities/interests as they relate to the **current manuscript only**.

The author’s relationships/activities/interests should be **defined broadly**. For example, if your manuscript pertains to the epidemiology of hypertension, you should declare all relationships with manufacturers of antihypertensive medication, even if that medication is not mentioned in the manuscript.

In item #1 below, report all support for the work reported in this manuscript without time limit. For all other items, the time frame for disclosure is the past 36 months.

|                                                           |                                                                                                                                                                                | Name all entities with whom you have this relationship or indicate none (add rows as needed) | Specifications/Comments (e.g., if payments were made to you or to your institution) |
|-----------------------------------------------------------|--------------------------------------------------------------------------------------------------------------------------------------------------------------------------------|----------------------------------------------------------------------------------------------|-------------------------------------------------------------------------------------|
| <b>Time frame: Since the initial planning of the work</b> |                                                                                                                                                                                |                                                                                              |                                                                                     |
| 1                                                         | All support for the present manuscript (e.g., funding, provision of study materials, medical writing, article processing charges, etc.)<br><b>No time limit for this item.</b> | None                                                                                         |                                                                                     |
|                                                           |                                                                                                                                                                                |                                                                                              |                                                                                     |
|                                                           |                                                                                                                                                                                |                                                                                              |                                                                                     |
|                                                           |                                                                                                                                                                                |                                                                                              |                                                                                     |
|                                                           |                                                                                                                                                                                |                                                                                              |                                                                                     |
| <b>Time frame: past 36 months</b>                         |                                                                                                                                                                                |                                                                                              |                                                                                     |
| 2                                                         | Grants or contracts from any entity (if not indicated in item #1 above).                                                                                                       | None                                                                                         |                                                                                     |
|                                                           |                                                                                                                                                                                |                                                                                              |                                                                                     |
| 3                                                         | Royalties or licenses                                                                                                                                                          | None                                                                                         |                                                                                     |
|                                                           |                                                                                                                                                                                |                                                                                              |                                                                                     |
| 4                                                         | Consulting fees                                                                                                                                                                | None                                                                                         |                                                                                     |
|                                                           |                                                                                                                                                                                |                                                                                              |                                                                                     |
|                                                           |                                                                                                                                                                                |                                                                                              |                                                                                     |



|    |                                                                                                              |      |  |
|----|--------------------------------------------------------------------------------------------------------------|------|--|
| 5  | Payment or honoraria for lectures, presentations, speakers bureaus, manuscript writing or educational events | None |  |
| 6  | Payment for expert testimony                                                                                 | None |  |
| 7  | Support for attending meetings and/or travel                                                                 | None |  |
| 8  | Patents planned, issued or pending                                                                           | None |  |
| 9  | Participation on a Data Safety Monitoring Board or Advisory Board                                            | None |  |
| 10 | Leadership or fiduciary role in other board, society, committee or advocacy group, paid or unpaid            | None |  |
| 11 | Stock or stock options                                                                                       | None |  |
| 12 | Receipt of equipment, materials, drugs, medical writing, gifts or other services                             | None |  |
| 13 | Other financial or non-financial interests                                                                   | None |  |

**Please summarize the above conflict of interest in the following box:**

none

**Please place an "X" next to the following statement to indicate your agreement:**

**I certify that I have answered every question and have not altered the wording of any of the questions on this form.**



**Time frame: past 36 months**

|    |                                                                                                              |      |  |
|----|--------------------------------------------------------------------------------------------------------------|------|--|
| 2  | Grants or contracts from any entity (if not indicated in item #1 above).                                     | None |  |
|    |                                                                                                              |      |  |
|    |                                                                                                              |      |  |
| 3  | Royalties or licenses                                                                                        | None |  |
|    |                                                                                                              |      |  |
|    |                                                                                                              |      |  |
| 4  | Consulting fees                                                                                              | None |  |
|    |                                                                                                              | None |  |
|    |                                                                                                              |      |  |
| 5  | Payment or honoraria for lectures, presentations, speakers bureaus, manuscript writing or educational events | None |  |
|    |                                                                                                              |      |  |
|    |                                                                                                              |      |  |
| 6  | Payment for expert testimony                                                                                 | None |  |
|    |                                                                                                              |      |  |
|    |                                                                                                              |      |  |
| 7  | Support for attending meetings and/or travel                                                                 | None |  |
|    |                                                                                                              |      |  |
|    |                                                                                                              |      |  |
| 8  | Patents planned, issued or pending                                                                           | None |  |
|    |                                                                                                              |      |  |
|    |                                                                                                              |      |  |
| 9  | Participation on a Data Safety Monitoring Board or Advisory Board                                            | None |  |
|    |                                                                                                              |      |  |
|    |                                                                                                              |      |  |
| 10 | Leadership or fiduciary role in other board, society, committee or advocacy group, paid or unpaid            | None |  |
|    |                                                                                                              |      |  |
|    |                                                                                                              |      |  |

|    |                                                                                  |      |  |
|----|----------------------------------------------------------------------------------|------|--|
| 11 | Stock or stock options                                                           | None |  |
|    |                                                                                  |      |  |
|    |                                                                                  |      |  |
| 12 | Receipt of equipment, materials, drugs, medical writing, gifts or other services | None |  |
|    |                                                                                  |      |  |
|    |                                                                                  |      |  |
| 13 | Other financial or non-financial interests                                       | None |  |
|    |                                                                                  |      |  |
|    |                                                                                  |      |  |

**Please summarize the above conflict of interest in the following box:**

**Please place an "X" next to the following statement to indicate your agreement:**

**X   I certify that I have answered every question and have not altered the wording of any of the questions on this form.**

## ICMJE DISCLOSURE FORM

Date: Dec 15 2022  
 Your Name: Xianzhuo Zhang  
 Manuscript Title: The SUPER 2022 reporting guideline for suggested reporting of surgical technique  
 Manuscript number (if known): HBSN-22-509-R1

In the interest of transparency, we ask you to disclose all relationships/activities/interests listed below that are related to the content of your manuscript. "Related" means any relation with for-profit or not-for-profit third parties whose interests may be affected by the content of the manuscript. Disclosure represents a commitment to transparency and does not necessarily indicate a bias. If you are in doubt about whether to list a relationship/activity/interest, it is preferable that you do so.

The following questions apply to the author's relationships/activities/interests as they relate to the **current manuscript only**.

The author's relationships/activities/interests should be **defined broadly**. For example, if your manuscript pertains to the epidemiology of hypertension, you should declare all relationships with manufacturers of antihypertensive medication, even if that medication is not mentioned in the manuscript.

In item #1 below, report all support for the work reported in this manuscript without time limit. For all other items, the time frame for disclosure is the past 36 months.

|                                                           |                                                                                                                                                                                | Name all entities with whom you have this relationship or indicate none (add rows as needed) | Specifications/Comments (e.g., if payments were made to you or to your institution) |
|-----------------------------------------------------------|--------------------------------------------------------------------------------------------------------------------------------------------------------------------------------|----------------------------------------------------------------------------------------------|-------------------------------------------------------------------------------------|
| <b>Time frame: Since the initial planning of the work</b> |                                                                                                                                                                                |                                                                                              |                                                                                     |
| 1                                                         | All support for the present manuscript (e.g., funding, provision of study materials, medical writing, article processing charges, etc.)<br><b>No time limit for this item.</b> | None                                                                                         |                                                                                     |
|                                                           |                                                                                                                                                                                |                                                                                              |                                                                                     |
|                                                           |                                                                                                                                                                                |                                                                                              |                                                                                     |
|                                                           |                                                                                                                                                                                |                                                                                              |                                                                                     |
|                                                           |                                                                                                                                                                                |                                                                                              |                                                                                     |
|                                                           |                                                                                                                                                                                |                                                                                              |                                                                                     |
| <b>Time frame: past 36 months</b>                         |                                                                                                                                                                                |                                                                                              |                                                                                     |
| 2                                                         | Grants or contracts from any entity (if not indicated in item #1 above).                                                                                                       | None                                                                                         |                                                                                     |
|                                                           |                                                                                                                                                                                |                                                                                              |                                                                                     |
| 3                                                         | Royalties or licenses                                                                                                                                                          | None                                                                                         |                                                                                     |
|                                                           |                                                                                                                                                                                |                                                                                              |                                                                                     |
| 4                                                         | Consulting fees                                                                                                                                                                | None                                                                                         |                                                                                     |
|                                                           |                                                                                                                                                                                |                                                                                              |                                                                                     |
|                                                           |                                                                                                                                                                                |                                                                                              |                                                                                     |

|    |                                                                                                              |      |  |
|----|--------------------------------------------------------------------------------------------------------------|------|--|
| 5  | Payment or honoraria for lectures, presentations, speakers bureaus, manuscript writing or educational events | None |  |
| 6  | Payment for expert testimony                                                                                 | None |  |
| 7  | Support for attending meetings and/or travel                                                                 | None |  |
| 8  | Patents planned, issued or pending                                                                           | None |  |
| 9  | Participation on a Data Safety Monitoring Board or Advisory Board                                            | None |  |
| 10 | Leadership or fiduciary role in other board, society, committee or advocacy group, paid or unpaid            | None |  |
| 11 | Stock or stock options                                                                                       | None |  |
| 12 | Receipt of equipment, materials, drugs, medical writing, gifts or other services                             | None |  |
| 13 | Other financial or non-financial interests                                                                   | None |  |

**Please summarize the above conflict of interest in the following box:**

The author has no conflicts of interest or financial ties to disclose.

**Please place an "X" next to the following statement to indicate your agreement:**

X  I certify that I have answered every question and have not altered the wording of any of the questions on this form.

## ICMJE DISCLOSURE FORM

Date: Dec. 14<sup>th</sup>, 2022

Your Name: Panpan Jiao

Manuscript Title: The SUPER 2022 reporting guideline for suggested reporting of surgical technique

Manuscript number (if known): HBSN-22-509

In the interest of transparency, we ask you to disclose all relationships/activities/interests listed below that are related to the content of your manuscript. "Related" means any relation with for-profit or not-for-profit third parties whose interests may be affected by the content of the manuscript. Disclosure represents a commitment to transparency and does not necessarily indicate a bias. If you are in doubt about whether to list a relationship/activity/interest, it is preferable that you do so.

The following questions apply to the author's relationships/activities/interests as they relate to the current manuscript only.

The author's relationships/activities/interests should be defined broadly. For example, if your manuscript pertains to the epidemiology of hypertension, you should declare all relationships with manufacturers of antihypertensive medication, even if that medication is not mentioned in the manuscript.

In item #1 below, report all support for the work reported in this manuscript without time limit. For all other items, the time frame for disclosure is the past 36 months.

|                                                           |                                                                                                                                                                                | Name all entities with whom you have this relationship or indicate none (add rows as needed) | Specifications/Comments (e.g., if payments were made to you or to your institution) |
|-----------------------------------------------------------|--------------------------------------------------------------------------------------------------------------------------------------------------------------------------------|----------------------------------------------------------------------------------------------|-------------------------------------------------------------------------------------|
| <b>Time frame: Since the initial planning of the work</b> |                                                                                                                                                                                |                                                                                              |                                                                                     |
| 1                                                         | All support for the present manuscript (e.g., funding, provision of study materials, medical writing, article processing charges, etc.)<br><b>No time limit for this item.</b> | <u>__X__</u> None                                                                            |                                                                                     |
|                                                           |                                                                                                                                                                                |                                                                                              |                                                                                     |
|                                                           |                                                                                                                                                                                |                                                                                              |                                                                                     |
|                                                           |                                                                                                                                                                                |                                                                                              |                                                                                     |
|                                                           |                                                                                                                                                                                |                                                                                              |                                                                                     |
|                                                           |                                                                                                                                                                                |                                                                                              |                                                                                     |
| <b>Time frame: past 36 months</b>                         |                                                                                                                                                                                |                                                                                              |                                                                                     |
| 2                                                         | Grants or contracts from any entity (if not indicated in item #1 above).                                                                                                       | <u>__X__</u> None                                                                            |                                                                                     |
|                                                           |                                                                                                                                                                                |                                                                                              |                                                                                     |
| 3                                                         | Royalties or licenses                                                                                                                                                          | <u>__X__</u> None                                                                            |                                                                                     |
|                                                           |                                                                                                                                                                                |                                                                                              |                                                                                     |
| 4                                                         | Consulting fees                                                                                                                                                                | <u>__X__</u> None                                                                            |                                                                                     |
|                                                           |                                                                                                                                                                                |                                                                                              |                                                                                     |

|    |                                                                                                              |                                          |  |
|----|--------------------------------------------------------------------------------------------------------------|------------------------------------------|--|
|    |                                                                                                              |                                          |  |
| 5  | Payment or honoraria for lectures, presentations, speakers bureaus, manuscript writing or educational events | <input checked="" type="checkbox"/> None |  |
| 6  | Payment for expert testimony                                                                                 | <input checked="" type="checkbox"/> None |  |
| 7  | Support for attending meetings and/or travel                                                                 | <input checked="" type="checkbox"/> None |  |
| 8  | Patents planned, issued or pending                                                                           | <input checked="" type="checkbox"/> None |  |
| 9  | Participation on a Data Safety Monitoring Board or Advisory Board                                            | <input checked="" type="checkbox"/> None |  |
| 10 | Leadership or fiduciary role in other board, society, committee or advocacy group, paid or unpaid            | <input checked="" type="checkbox"/> None |  |
| 11 | Stock or stock options                                                                                       | <input checked="" type="checkbox"/> None |  |
| 12 | Receipt of equipment, materials, drugs, medical writing, gifts or other services                             | <input checked="" type="checkbox"/> None |  |
| 13 | Other financial or non-financial interests                                                                   | <input checked="" type="checkbox"/> None |  |

**Please summarize the above conflict of interest in the following box:**

None.

**Please place an "X" next to the following statement to indicate your agreement:**

I certify that I have answered every question and have not altered the wording of any of the questions on this form.



## ICMJE DISCLOSURE FORM

Date: 14<sup>th</sup> Dec 2022  
 Your Name: Yulong He  
 Manuscript Title: The SUPER 2022 reporting guideline for suggested reporting of surgical technique  
 Manuscript number (if known): HBSN-22-509-R1

In the interest of transparency, we ask you to disclose all relationships/activities/interests listed below that are related to the content of your manuscript. “Related” means any relation with for-profit or not-for-profit third parties whose interests may be affected by the content of the manuscript. Disclosure represents a commitment to transparency and does not necessarily indicate a bias. If you are in doubt about whether to list a relationship/activity/interest, it is preferable that you do so.

The following questions apply to the author’s relationships/activities/interests as they relate to the current manuscript only.

The author’s relationships/activities/interests should be defined broadly. For example, if your manuscript pertains to the epidemiology of hypertension, you should declare all relationships with manufacturers of antihypertensive medication, even if that medication is not mentioned in the manuscript.

In item #1 below, report all support for the work reported in this manuscript without time limit. For all other items, the time frame for disclosure is the past 36 months.

|                                                           |                                                                                                                                                                                | Name all entities with whom you have this relationship or indicate none (add rows as needed) | Specifications/Comments (e.g., if payments were made to you or to your institution) |
|-----------------------------------------------------------|--------------------------------------------------------------------------------------------------------------------------------------------------------------------------------|----------------------------------------------------------------------------------------------|-------------------------------------------------------------------------------------|
| <b>Time frame: Since the initial planning of the work</b> |                                                                                                                                                                                |                                                                                              |                                                                                     |
| 1                                                         | All support for the present manuscript (e.g., funding, provision of study materials, medical writing, article processing charges, etc.)<br><b>No time limit for this item.</b> | None                                                                                         |                                                                                     |
|                                                           |                                                                                                                                                                                |                                                                                              |                                                                                     |
|                                                           |                                                                                                                                                                                |                                                                                              |                                                                                     |
|                                                           |                                                                                                                                                                                |                                                                                              |                                                                                     |
|                                                           |                                                                                                                                                                                |                                                                                              |                                                                                     |
|                                                           |                                                                                                                                                                                |                                                                                              |                                                                                     |
| <b>Time frame: past 36 months</b>                         |                                                                                                                                                                                |                                                                                              |                                                                                     |
| 2                                                         | Grants or contracts from any entity (if not indicated in item #1 above).                                                                                                       | None                                                                                         |                                                                                     |
|                                                           |                                                                                                                                                                                |                                                                                              |                                                                                     |
| 3                                                         | Royalties or licenses                                                                                                                                                          | None                                                                                         |                                                                                     |
|                                                           |                                                                                                                                                                                |                                                                                              |                                                                                     |
| 4                                                         | Consulting fees                                                                                                                                                                | None                                                                                         |                                                                                     |
|                                                           |                                                                                                                                                                                |                                                                                              |                                                                                     |
|                                                           |                                                                                                                                                                                |                                                                                              |                                                                                     |

|    |                                                                                                              |      |  |
|----|--------------------------------------------------------------------------------------------------------------|------|--|
| 5  | Payment or honoraria for lectures, presentations, speakers bureaus, manuscript writing or educational events | None |  |
|    |                                                                                                              |      |  |
|    |                                                                                                              |      |  |
| 6  | Payment for expert testimony                                                                                 | None |  |
|    |                                                                                                              |      |  |
|    |                                                                                                              |      |  |
| 7  | Support for attending meetings and/or travel                                                                 | None |  |
|    |                                                                                                              |      |  |
|    |                                                                                                              |      |  |
| 8  | Patents planned, issued or pending                                                                           | None |  |
|    |                                                                                                              |      |  |
|    |                                                                                                              |      |  |
| 9  | Participation on a Data Safety Monitoring Board or Advisory Board                                            | None |  |
|    |                                                                                                              |      |  |
|    |                                                                                                              |      |  |
| 10 | Leadership or fiduciary role in other board, society, committee or advocacy group, paid or unpaid            | None |  |
|    |                                                                                                              |      |  |
|    |                                                                                                              |      |  |
| 11 | Stock or stock options                                                                                       | None |  |
|    |                                                                                                              |      |  |
|    |                                                                                                              |      |  |
| 12 | Receipt of equipment, materials, drugs, medical writing, gifts or other services                             | None |  |
|    |                                                                                                              |      |  |
|    |                                                                                                              |      |  |
| 13 | Other financial or non-financial interests                                                                   | None |  |
|    |                                                                                                              |      |  |
|    |                                                                                                              |      |  |

**Please summarize the above conflict of interest in the following box:**

|      |
|------|
| None |
|------|

**Please place an "X" next to the following statement to indicate your agreement:**

X  I certify that I have answered every question and have not altered the wording of any of the questions on this form.

## ICMJE DISCLOSURE FORM

Date: December 13, 2022

Your Name: Nuria M. Novoa

Manuscript Title: The SUPER 2022 reporting guideline for suggested reporting of surgical technique\_\_

Manuscript number (if known): HBSN-22-509-R1

In the interest of transparency, we ask you to disclose all relationships/activities/interests listed below that are related to the content of your manuscript. "Related" means any relation with for-profit or not-for-profit third parties whose interests may be affected by the content of the manuscript. Disclosure represents a commitment to transparency and does not necessarily indicate a bias. If you are in doubt about whether to list a relationship/activity/interest, it is preferable that you do so.

The following questions apply to the author's relationships/activities/interests as they relate to the **current manuscript only**.

The author's relationships/activities/interests should be **defined broadly**. For example, if your manuscript pertains to the epidemiology of hypertension, you should declare all relationships with manufacturers of antihypertensive medication, even if that medication is not mentioned in the manuscript.

In item #1 below, report all support for the work reported in this manuscript without time limit. For all other items, the time frame for disclosure is the past 36 months.

|                                                           |                                                                                                                                                                                | Name all entities with whom you have this relationship or indicate none (add rows as needed) | Specifications/Comments (e.g., if payments were made to you or to your institution) |
|-----------------------------------------------------------|--------------------------------------------------------------------------------------------------------------------------------------------------------------------------------|----------------------------------------------------------------------------------------------|-------------------------------------------------------------------------------------|
| <b>Time frame: Since the initial planning of the work</b> |                                                                                                                                                                                |                                                                                              |                                                                                     |
| 1                                                         | All support for the present manuscript (e.g., funding, provision of study materials, medical writing, article processing charges, etc.)<br><b>No time limit for this item.</b> | None                                                                                         |                                                                                     |
|                                                           |                                                                                                                                                                                |                                                                                              |                                                                                     |
|                                                           |                                                                                                                                                                                |                                                                                              |                                                                                     |
|                                                           |                                                                                                                                                                                |                                                                                              |                                                                                     |
|                                                           |                                                                                                                                                                                |                                                                                              |                                                                                     |
|                                                           |                                                                                                                                                                                |                                                                                              |                                                                                     |
|                                                           |                                                                                                                                                                                |                                                                                              |                                                                                     |
| <b>Time frame: past 36 months</b>                         |                                                                                                                                                                                |                                                                                              |                                                                                     |
| 2                                                         | Grants or contracts from any entity (if not indicated in item #1 above).                                                                                                       | None                                                                                         |                                                                                     |
|                                                           |                                                                                                                                                                                |                                                                                              |                                                                                     |
| 3                                                         | Royalties or licenses                                                                                                                                                          | None                                                                                         |                                                                                     |
|                                                           |                                                                                                                                                                                |                                                                                              |                                                                                     |
| 4                                                         | Consulting fees                                                                                                                                                                | None                                                                                         |                                                                                     |
|                                                           |                                                                                                                                                                                |                                                                                              |                                                                                     |
|                                                           |                                                                                                                                                                                |                                                                                              |                                                                                     |

|    |                                                                                                              |      |  |
|----|--------------------------------------------------------------------------------------------------------------|------|--|
| 5  | Payment or honoraria for lectures, presentations, speakers bureaus, manuscript writing or educational events | None |  |
|    |                                                                                                              |      |  |
|    |                                                                                                              |      |  |
| 6  | Payment for expert testimony                                                                                 | None |  |
|    |                                                                                                              |      |  |
|    |                                                                                                              |      |  |
| 7  | Support for attending meetings and/or travel                                                                 | None |  |
|    |                                                                                                              |      |  |
|    |                                                                                                              |      |  |
| 8  | Patents planned, issued or pending                                                                           | None |  |
|    |                                                                                                              |      |  |
|    |                                                                                                              |      |  |
| 9  | Participation on a Data Safety Monitoring Board or Advisory Board                                            | None |  |
|    |                                                                                                              |      |  |
|    |                                                                                                              |      |  |
| 10 | Leadership or fiduciary role in other board, society, committee or advocacy group, paid or unpaid            | None |  |
|    |                                                                                                              |      |  |
|    |                                                                                                              |      |  |
| 11 | Stock or stock options                                                                                       | None |  |
|    |                                                                                                              |      |  |
|    |                                                                                                              |      |  |
| 12 | Receipt of equipment, materials, drugs, medical writing, gifts or other services                             | None |  |
|    |                                                                                                              |      |  |
|    |                                                                                                              |      |  |
| 13 | Other financial or non-financial interests                                                                   | None |  |
|    |                                                                                                              |      |  |
|    |                                                                                                              |      |  |

**Please summarize the above conflict of interest in the following box:**

No conflict of interest to report

**Please place an "X" next to the following statement to indicate your agreement:**

  X   I certify that I have answered every question and have not altered the wording of any of the questions on this form.

*Maria Monica Valente*

## ICMJE DISCLOSURE FORM

**Date:** 13<sup>th</sup> DECEMBER 2022

**Your Name:** Benedetta Bedetti

**Manuscript Title:** The SUPER 2022 reporting guideline for suggested reporting of surgical technique

**Manuscript number (if known):** HBSN-22-509-R1

In the interest of transparency, we ask you to disclose all relationships/activities/interests listed below that are related to the content of your manuscript. "Related" means any relation with for-profit or not-for-profit third parties whose interests may be affected by the content of the manuscript. Disclosure represents a commitment to transparency and does not necessarily indicate a bias. If you are in doubt about whether to list a relationship/activity/interest, it is preferable that you do so.

The following questions apply to the author's relationships/activities/interests as they relate to the current manuscript only.

The author's relationships/activities/interests should be defined broadly. For example, if your manuscript pertains to the epidemiology of hypertension, you should declare all relationships with manufacturers of antihypertensive medication, even if that medication is not mentioned in the manuscript.

In item #1 below, report all support for the work reported in this manuscript without time limit. For all other items, the time frame for disclosure is the past 36 months.

|                                                           |                                                                                                                                                                                | Name all entities with whom you have this relationship or indicate none (add rows as needed) | Specifications/Comments (e.g., if payments were made to you or to your institution) |
|-----------------------------------------------------------|--------------------------------------------------------------------------------------------------------------------------------------------------------------------------------|----------------------------------------------------------------------------------------------|-------------------------------------------------------------------------------------|
| <b>Time frame: Since the initial planning of the work</b> |                                                                                                                                                                                |                                                                                              |                                                                                     |
| 1                                                         | All support for the present manuscript (e.g., funding, provision of study materials, medical writing, article processing charges, etc.)<br><b>No time limit for this item.</b> | None                                                                                         |                                                                                     |
|                                                           |                                                                                                                                                                                |                                                                                              |                                                                                     |
|                                                           |                                                                                                                                                                                |                                                                                              |                                                                                     |
|                                                           |                                                                                                                                                                                |                                                                                              |                                                                                     |
|                                                           |                                                                                                                                                                                |                                                                                              |                                                                                     |
| <b>Time frame: past 36 months</b>                         |                                                                                                                                                                                |                                                                                              |                                                                                     |
| 2                                                         | Grants or contracts from any entity (if not indicated in item #1 above).                                                                                                       | None                                                                                         |                                                                                     |
|                                                           |                                                                                                                                                                                |                                                                                              |                                                                                     |
| 3                                                         | Royalties or licenses                                                                                                                                                          | None                                                                                         |                                                                                     |
|                                                           |                                                                                                                                                                                |                                                                                              |                                                                                     |
| 4                                                         | Consulting fees                                                                                                                                                                | None                                                                                         |                                                                                     |
|                                                           |                                                                                                                                                                                |                                                                                              |                                                                                     |
|                                                           |                                                                                                                                                                                |                                                                                              |                                                                                     |

|    |                                                                                                              |      |  |
|----|--------------------------------------------------------------------------------------------------------------|------|--|
| 5  | Payment or honoraria for lectures, presentations, speakers bureaus, manuscript writing or educational events | None |  |
|    |                                                                                                              |      |  |
|    |                                                                                                              |      |  |
| 6  | Payment for expert testimony                                                                                 | None |  |
|    |                                                                                                              |      |  |
|    |                                                                                                              |      |  |
| 7  | Support for attending meetings and/or travel                                                                 | None |  |
|    |                                                                                                              |      |  |
|    |                                                                                                              |      |  |
| 8  | Patents planned, issued or pending                                                                           | None |  |
|    |                                                                                                              |      |  |
|    |                                                                                                              |      |  |
| 9  | Participation on a Data Safety Monitoring Board or Advisory Board                                            | None |  |
|    |                                                                                                              |      |  |
|    |                                                                                                              |      |  |
| 10 | Leadership or fiduciary role in other board, society, committee or advocacy group, paid or unpaid            | None |  |
|    |                                                                                                              |      |  |
|    |                                                                                                              |      |  |
| 11 | Stock or stock options                                                                                       | None |  |
|    |                                                                                                              |      |  |
|    |                                                                                                              |      |  |
| 12 | Receipt of equipment, materials, drugs, medical writing, gifts or other services                             | None |  |
|    |                                                                                                              |      |  |
|    |                                                                                                              |      |  |
| 13 | Other financial or non-financial interests                                                                   | None |  |
|    |                                                                                                              |      |  |
|    |                                                                                                              |      |  |

**Please summarize the above conflict of interest in the following box:**

|      |
|------|
| NONE |
|------|

**Please place an "X" next to the following statement to indicate your agreement:**

**X I certify that I have answered every question and have not altered the wording of any of the questions on this form.**

## ICMJE DISCLOSURE FORM

Date: 14 Dec 2022

Your Name: Sebastien Gilbert

Manuscript Title: The SUPER 2022 reporting guideline for suggested reporting of surgical technique

Manuscript number (if known): HBSN-22-509-R1

In the interest of transparency, we ask you to disclose all relationships/activities/interests listed below that are related to the content of your manuscript. "Related" means any relation with for-profit or not-for-profit third parties whose interests may be affected by the content of the manuscript. Disclosure represents a commitment to transparency and does not necessarily indicate a bias. If you are in doubt about whether to list a relationship/activity/interest, it is preferable that you do so.

The following questions apply to the author's relationships/activities/interests as they relate to the current manuscript only.

The author's relationships/activities/interests should be defined broadly. For example, if your manuscript pertains to the epidemiology of hypertension, you should declare all relationships with manufacturers of antihypertensive medication, even if that medication is not mentioned in the manuscript.

In item #1 below, report all support for the work reported in this manuscript without time limit. For all other items, the time frame for disclosure is the past 36 months.

|                                                           |                                                                                                                                                                                | Name all entities with whom you have this relationship or indicate none (add rows as needed) | Specifications/Comments (e.g., if payments were made to you or to your institution) |
|-----------------------------------------------------------|--------------------------------------------------------------------------------------------------------------------------------------------------------------------------------|----------------------------------------------------------------------------------------------|-------------------------------------------------------------------------------------|
| <b>Time frame: Since the initial planning of the work</b> |                                                                                                                                                                                |                                                                                              |                                                                                     |
| 1                                                         | All support for the present manuscript (e.g., funding, provision of study materials, medical writing, article processing charges, etc.)<br><b>No time limit for this item.</b> | None                                                                                         |                                                                                     |
|                                                           |                                                                                                                                                                                |                                                                                              |                                                                                     |
|                                                           |                                                                                                                                                                                |                                                                                              |                                                                                     |
|                                                           |                                                                                                                                                                                |                                                                                              |                                                                                     |
|                                                           |                                                                                                                                                                                |                                                                                              |                                                                                     |
| <b>Time frame: past 36 months</b>                         |                                                                                                                                                                                |                                                                                              |                                                                                     |
| 2                                                         | Grants or contracts from any entity (if not indicated in item #1 above).                                                                                                       | None                                                                                         |                                                                                     |
|                                                           |                                                                                                                                                                                |                                                                                              |                                                                                     |
| 3                                                         | Royalties or licenses                                                                                                                                                          | None                                                                                         |                                                                                     |
|                                                           |                                                                                                                                                                                |                                                                                              |                                                                                     |
| 4                                                         | Consulting fees                                                                                                                                                                | None                                                                                         |                                                                                     |
|                                                           |                                                                                                                                                                                |                                                                                              |                                                                                     |
|                                                           |                                                                                                                                                                                |                                                                                              |                                                                                     |

|    |                                                                                                              |      |  |
|----|--------------------------------------------------------------------------------------------------------------|------|--|
| 5  | Payment or honoraria for lectures, presentations, speakers bureaus, manuscript writing or educational events | None |  |
|    |                                                                                                              |      |  |
|    |                                                                                                              |      |  |
| 6  | Payment for expert testimony                                                                                 | None |  |
|    |                                                                                                              |      |  |
|    |                                                                                                              |      |  |
| 7  | Support for attending meetings and/or travel                                                                 | None |  |
|    |                                                                                                              |      |  |
|    |                                                                                                              |      |  |
| 8  | Patents planned, issued or pending                                                                           | None |  |
|    |                                                                                                              |      |  |
|    |                                                                                                              |      |  |
| 9  | Participation on a Data Safety Monitoring Board or Advisory Board                                            | None |  |
|    |                                                                                                              |      |  |
|    |                                                                                                              |      |  |
| 10 | Leadership or fiduciary role in other board, society, committee or advocacy group, paid or unpaid            | None |  |
|    |                                                                                                              |      |  |
|    |                                                                                                              |      |  |
| 11 | Stock or stock options                                                                                       | None |  |
|    |                                                                                                              |      |  |
|    |                                                                                                              |      |  |
| 12 | Receipt of equipment, materials, drugs, medical writing, gifts or other services                             | None |  |
|    |                                                                                                              |      |  |
|    |                                                                                                              |      |  |
| 13 | Other financial or non-financial interests                                                                   | None |  |
|    |                                                                                                              |      |  |
|    |                                                                                                              |      |  |

**Please summarize the above conflict of interest in the following box:**

**Please place an "X" next to the following statement to indicate your agreement:**

  X   I certify that I have answered every question and have not altered the wording of any of the questions on this form.



## ICMJE DISCLOSURE FORM

Date: 26<sup>th</sup> Dec 2022  
 Your Name: Alan D. L. Sihoe  
 Manuscript Title: The SUPER 2022 reporting guideline for suggested reporting of surgical technique  
 Manuscript number (if known): HBSN-22-509-R1

In the interest of transparency, we ask you to disclose all relationships/activities/interests listed below that are related to the content of your manuscript. "Related" means any relation with for-profit or not-for-profit third parties whose interests may be affected by the content of the manuscript. Disclosure represents a commitment to transparency and does not necessarily indicate a bias. If you are in doubt about whether to list a relationship/activity/interest, it is preferable that you do so.

The following questions apply to the author's relationships/activities/interests as they relate to the current manuscript only.

The author's relationships/activities/interests should be defined broadly. For example, if your manuscript pertains to the epidemiology of hypertension, you should declare all relationships with manufacturers of antihypertensive medication, even if that medication is not mentioned in the manuscript.

In item #1 below, report all support for the work reported in this manuscript without time limit. For all other items, the time frame for disclosure is the past 36 months.

|                                                           |                                                                                                                                                                                | Name all entities with whom you have this relationship or indicate none (add rows as needed) | Specifications/Comments (e.g., if payments were made to you or to your institution) |
|-----------------------------------------------------------|--------------------------------------------------------------------------------------------------------------------------------------------------------------------------------|----------------------------------------------------------------------------------------------|-------------------------------------------------------------------------------------|
| <b>Time frame: Since the initial planning of the work</b> |                                                                                                                                                                                |                                                                                              |                                                                                     |
| 1                                                         | All support for the present manuscript (e.g., funding, provision of study materials, medical writing, article processing charges, etc.)<br><b>No time limit for this item.</b> | None                                                                                         |                                                                                     |
|                                                           |                                                                                                                                                                                |                                                                                              |                                                                                     |
|                                                           |                                                                                                                                                                                |                                                                                              |                                                                                     |
|                                                           |                                                                                                                                                                                |                                                                                              |                                                                                     |
|                                                           |                                                                                                                                                                                |                                                                                              |                                                                                     |
| <b>Time frame: past 36 months</b>                         |                                                                                                                                                                                |                                                                                              |                                                                                     |
| 2                                                         | Grants or contracts from any entity (if not indicated in item #1 above).                                                                                                       | None                                                                                         |                                                                                     |
|                                                           |                                                                                                                                                                                |                                                                                              |                                                                                     |
| 3                                                         | Royalties or licenses                                                                                                                                                          | None                                                                                         |                                                                                     |
|                                                           |                                                                                                                                                                                |                                                                                              |                                                                                     |
| 4                                                         | Consulting fees                                                                                                                                                                | None                                                                                         |                                                                                     |
|                                                           |                                                                                                                                                                                |                                                                                              |                                                                                     |
|                                                           |                                                                                                                                                                                |                                                                                              |                                                                                     |

|    |                                                                                                              |      |  |
|----|--------------------------------------------------------------------------------------------------------------|------|--|
| 5  | Payment or honoraria for lectures, presentations, speakers bureaus, manuscript writing or educational events | None |  |
| 6  | Payment for expert testimony                                                                                 | None |  |
| 7  | Support for attending meetings and/or travel                                                                 | None |  |
| 8  | Patents planned, issued or pending                                                                           | None |  |
| 9  | Participation on a Data Safety Monitoring Board or Advisory Board                                            | None |  |
| 10 | Leadership or fiduciary role in other board, society, committee or advocacy group, paid or unpaid            | None |  |
| 11 | Stock or stock options                                                                                       | None |  |
| 12 | Receipt of equipment, materials, drugs, medical writing, gifts or other services                             | None |  |
| 13 | Other financial or non-financial interests                                                                   | None |  |

**Please summarize the above conflict of interest in the following box:**

none

**Please place an "X" next to the following statement to indicate your agreement:**

**I certify that I have answered every question and have not altered the wording of any of the questions on this form.**

## ICMJE DISCLOSURE FORM

Date: 31.12.2022

Your Name: Alper Toker

Manuscript Title: The SUPER 2022 reporting guideline for suggested reporting of surgical technique

Manuscript number (if known): HBSN-22-509-R1

In the interest of transparency, we ask you to disclose all relationships/activities/interests listed below that are related to the content of your manuscript. "Related" means any relation with for-profit or not-for-profit third parties whose interests may be affected by the content of the manuscript. Disclosure represents a commitment to transparency and does not necessarily indicate a bias. If you are in doubt about whether to list a relationship/activity/interest, it is preferable that you do so.

The following questions apply to the author's relationships/activities/interests as they relate to the current manuscript only.

The author's relationships/activities/interests should be defined broadly. For example, if your manuscript pertains to the epidemiology of hypertension, you should declare all relationships with manufacturers of antihypertensive medication, even if that medication is not mentioned in the manuscript.

In item #1 below, report all support for the work reported in this manuscript without time limit. For all other items, the time frame for disclosure is the past 36 months.

|                                                           |                                                                                                                                                                                | Name all entities with whom you have this relationship or indicate none (add rows as needed) | Specifications/Comments (e.g., if payments were made to you or to your institution) |
|-----------------------------------------------------------|--------------------------------------------------------------------------------------------------------------------------------------------------------------------------------|----------------------------------------------------------------------------------------------|-------------------------------------------------------------------------------------|
| <b>Time frame: Since the initial planning of the work</b> |                                                                                                                                                                                |                                                                                              |                                                                                     |
| 1                                                         | All support for the present manuscript (e.g., funding, provision of study materials, medical writing, article processing charges, etc.)<br><b>No time limit for this item.</b> | None                                                                                         |                                                                                     |
|                                                           |                                                                                                                                                                                |                                                                                              |                                                                                     |
|                                                           |                                                                                                                                                                                |                                                                                              |                                                                                     |
|                                                           |                                                                                                                                                                                |                                                                                              |                                                                                     |
|                                                           |                                                                                                                                                                                |                                                                                              |                                                                                     |
| <b>Time frame: past 36 months</b>                         |                                                                                                                                                                                |                                                                                              |                                                                                     |
| 2                                                         | Grants or contracts from any entity (if not indicated in item #1 above).                                                                                                       | None                                                                                         |                                                                                     |
|                                                           |                                                                                                                                                                                |                                                                                              |                                                                                     |
| 3                                                         | Royalties or licenses                                                                                                                                                          | None                                                                                         |                                                                                     |
|                                                           |                                                                                                                                                                                |                                                                                              |                                                                                     |
| 4                                                         | Consulting fees                                                                                                                                                                | None                                                                                         |                                                                                     |
|                                                           |                                                                                                                                                                                |                                                                                              |                                                                                     |
|                                                           |                                                                                                                                                                                |                                                                                              |                                                                                     |

|    |                                                                                                              |           |  |
|----|--------------------------------------------------------------------------------------------------------------|-----------|--|
| 5  | Payment or honoraria for lectures, presentations, speakers bureaus, manuscript writing or educational events | Intuitive |  |
|    |                                                                                                              |           |  |
|    |                                                                                                              |           |  |
| 6  | Payment for expert testimony                                                                                 | None      |  |
|    |                                                                                                              |           |  |
|    |                                                                                                              |           |  |
| 7  | Support for attending meetings and/or travel                                                                 | None      |  |
|    |                                                                                                              |           |  |
|    |                                                                                                              |           |  |
| 8  | Patents planned, issued or pending                                                                           | None      |  |
|    |                                                                                                              |           |  |
|    |                                                                                                              |           |  |
| 9  | Participation on a Data Safety Monitoring Board or Advisory Board                                            | None      |  |
|    |                                                                                                              |           |  |
|    |                                                                                                              |           |  |
| 10 | Leadership or fiduciary role in other board, society, committee or advocacy group, paid or unpaid            | None      |  |
|    |                                                                                                              |           |  |
|    |                                                                                                              |           |  |
| 11 | Stock or stock options                                                                                       | None      |  |
|    |                                                                                                              |           |  |
|    |                                                                                                              |           |  |
| 12 | Receipt of equipment, materials, drugs, medical writing, gifts or other services                             | None      |  |
|    |                                                                                                              |           |  |
|    |                                                                                                              |           |  |
| 13 | Other financial or non-financial interests                                                                   | None      |  |
|    |                                                                                                              |           |  |
|    |                                                                                                              |           |  |

**Please summarize the above conflict of interest in the following box:**

|                                      |
|--------------------------------------|
| <p>Consulting fee from Intuitive</p> |
|--------------------------------------|

**Please place an "X" next to the following statement to indicate your agreement:**

X  I certify that I have answered every question and have not altered the wording of any of the questions on this form.

## ICMJE DISCLOSURE FORM

Date: 26<sup>th</sup> Dec 2022  
 Your Name: Alfonso Fiorelli  
 Manuscript Title: The SUPER 2022 reporting guideline for suggested reporting of surgical technique  
 Manuscript number (if known): HBSN-22-509-R1

In the interest of transparency, we ask you to disclose all relationships/activities/interests listed below that are related to the content of your manuscript. "Related" means any relation with for-profit or not-for-profit third parties whose interests may be affected by the content of the manuscript. Disclosure represents a commitment to transparency and does not necessarily indicate a bias. If you are in doubt about whether to list a relationship/activity/interest, it is preferable that you do so.

The following questions apply to the author's relationships/activities/interests as they relate to the **current manuscript only**.

The author's relationships/activities/interests should be **defined broadly**. For example, if your manuscript pertains to the epidemiology of hypertension, you should declare all relationships with manufacturers of antihypertensive medication, even if that medication is not mentioned in the manuscript.

In item #1 below, report all support for the work reported in this manuscript without time limit. For all other items, the time frame for disclosure is the past 36 months.

|                                                           |                                                                                                                                                                                | Name all entities with whom you have this relationship or indicate none (add rows as needed) | Specifications/Comments (e.g., if payments were made to you or to your institution) |
|-----------------------------------------------------------|--------------------------------------------------------------------------------------------------------------------------------------------------------------------------------|----------------------------------------------------------------------------------------------|-------------------------------------------------------------------------------------|
| <b>Time frame: Since the initial planning of the work</b> |                                                                                                                                                                                |                                                                                              |                                                                                     |
| 1                                                         | All support for the present manuscript (e.g., funding, provision of study materials, medical writing, article processing charges, etc.)<br><b>No time limit for this item.</b> | None                                                                                         |                                                                                     |
|                                                           |                                                                                                                                                                                |                                                                                              |                                                                                     |
|                                                           |                                                                                                                                                                                |                                                                                              |                                                                                     |
|                                                           |                                                                                                                                                                                |                                                                                              |                                                                                     |
|                                                           |                                                                                                                                                                                |                                                                                              |                                                                                     |
| <b>Time frame: past 36 months</b>                         |                                                                                                                                                                                |                                                                                              |                                                                                     |
| 2                                                         | Grants or contracts from any entity (if not indicated in item #1 above).                                                                                                       | None                                                                                         |                                                                                     |
|                                                           |                                                                                                                                                                                |                                                                                              |                                                                                     |
| 3                                                         | Royalties or licenses                                                                                                                                                          | None                                                                                         |                                                                                     |
|                                                           |                                                                                                                                                                                |                                                                                              |                                                                                     |
| 4                                                         | Consulting fees                                                                                                                                                                | None                                                                                         |                                                                                     |
|                                                           |                                                                                                                                                                                |                                                                                              |                                                                                     |
|                                                           |                                                                                                                                                                                |                                                                                              |                                                                                     |

|    |                                                                                                              |      |  |
|----|--------------------------------------------------------------------------------------------------------------|------|--|
| 5  | Payment or honoraria for lectures, presentations, speakers bureaus, manuscript writing or educational events | None |  |
| 6  | Payment for expert testimony                                                                                 | None |  |
| 7  | Support for attending meetings and/or travel                                                                 | None |  |
| 8  | Patents planned, issued or pending                                                                           | None |  |
| 9  | Participation on a Data Safety Monitoring Board or Advisory Board                                            | None |  |
| 10 | Leadership or fiduciary role in other board, society, committee or advocacy group, paid or unpaid            | None |  |
| 11 | Stock or stock options                                                                                       | None |  |
| 12 | Receipt of equipment, materials, drugs, medical writing, gifts or other services                             | None |  |
| 13 | Other financial or non-financial interests                                                                   | None |  |

**Please summarize the above conflict of interest in the following box:**

none

**Please place an "X" next to the following statement to indicate your agreement:**

**I certify that I have answered every question and have not altered the wording of any of the questions on this form.**

## ICMJE DISCLOSURE FORM

Date: 13<sup>th</sup> Dec 2022  
 Your Name: Marcelo Jimenez  
 Manuscript Title: The SUPER 2022 reporting guideline for suggested reporting of surgical technique  
 Manuscript number (if known): HBSN-22-509-R1

In the interest of transparency, we ask you to disclose all relationships/activities/interests listed below that are related to the content of your manuscript. "Related" means any relation with for-profit or not-for-profit third parties whose interests may be affected by the content of the manuscript. Disclosure represents a commitment to transparency and does not necessarily indicate a bias. If you are in doubt about whether to list a relationship/activity/interest, it is preferable that you do so.

The following questions apply to the author's relationships/activities/interests as they relate to the current manuscript only.

The author's relationships/activities/interests should be defined broadly. For example, if your manuscript pertains to the epidemiology of hypertension, you should declare all relationships with manufacturers of antihypertensive medication, even if that medication is not mentioned in the manuscript.

In item #1 below, report all support for the work reported in this manuscript without time limit. For all other items, the time frame for disclosure is the past 36 months.

|                                                           |                                                                                                                                                                                | Name all entities with whom you have this relationship or indicate none (add rows as needed) | Specifications/Comments (e.g., if payments were made to you or to your institution) |
|-----------------------------------------------------------|--------------------------------------------------------------------------------------------------------------------------------------------------------------------------------|----------------------------------------------------------------------------------------------|-------------------------------------------------------------------------------------|
| <b>Time frame: Since the initial planning of the work</b> |                                                                                                                                                                                |                                                                                              |                                                                                     |
| 1                                                         | All support for the present manuscript (e.g., funding, provision of study materials, medical writing, article processing charges, etc.)<br><b>No time limit for this item.</b> | None                                                                                         |                                                                                     |
|                                                           |                                                                                                                                                                                |                                                                                              |                                                                                     |
|                                                           |                                                                                                                                                                                |                                                                                              |                                                                                     |
|                                                           |                                                                                                                                                                                |                                                                                              |                                                                                     |
|                                                           |                                                                                                                                                                                |                                                                                              |                                                                                     |
|                                                           |                                                                                                                                                                                |                                                                                              |                                                                                     |
|                                                           |                                                                                                                                                                                |                                                                                              |                                                                                     |
| <b>Time frame: past 36 months</b>                         |                                                                                                                                                                                |                                                                                              |                                                                                     |
| 2                                                         | Grants or contracts from any entity (if not indicated in item #1 above).                                                                                                       | None                                                                                         |                                                                                     |
|                                                           |                                                                                                                                                                                |                                                                                              |                                                                                     |
|                                                           |                                                                                                                                                                                |                                                                                              |                                                                                     |
| 3                                                         | Royalties or licenses                                                                                                                                                          | None                                                                                         |                                                                                     |
|                                                           |                                                                                                                                                                                |                                                                                              |                                                                                     |
|                                                           |                                                                                                                                                                                |                                                                                              |                                                                                     |
| 4                                                         | Consulting fees                                                                                                                                                                | Medtronic                                                                                    | To me                                                                               |
|                                                           |                                                                                                                                                                                | Intuitive                                                                                    | To me                                                                               |
|                                                           |                                                                                                                                                                                |                                                                                              |                                                                                     |

|    |                                                                                                              |           |       |
|----|--------------------------------------------------------------------------------------------------------------|-----------|-------|
| 5  | Payment or honoraria for lectures, presentations, speakers bureaus, manuscript writing or educational events | Medtronic | To me |
|    |                                                                                                              |           |       |
|    |                                                                                                              |           |       |
| 6  | Payment for expert testimony                                                                                 | None      |       |
|    |                                                                                                              |           |       |
|    |                                                                                                              |           |       |
| 7  | Support for attending meetings and/or travel                                                                 | None      |       |
|    |                                                                                                              |           |       |
|    |                                                                                                              |           |       |
| 8  | Patents planned, issued or pending                                                                           | None      |       |
|    |                                                                                                              |           |       |
|    |                                                                                                              |           |       |
| 9  | Participation on a Data Safety Monitoring Board or Advisory Board                                            | None      |       |
|    |                                                                                                              |           |       |
|    |                                                                                                              |           |       |
| 10 | Leadership or fiduciary role in other board, society, committee or advocacy group, paid or unpaid            | None      |       |
|    |                                                                                                              |           |       |
|    |                                                                                                              |           |       |
| 11 | Stock or stock options                                                                                       | None      |       |
|    |                                                                                                              |           |       |
|    |                                                                                                              |           |       |
| 12 | Receipt of equipment, materials, drugs, medical writing, gifts or other services                             | None      |       |
|    |                                                                                                              |           |       |
|    |                                                                                                              |           |       |
| 13 | Other financial or non-financial interests                                                                   | None      |       |
|    |                                                                                                              |           |       |
|    |                                                                                                              |           |       |

**Please summarize the above conflict of interest in the following box:**

Medtronic and Intuitive have provided consulting and lectures fees to me

**Please place an "X" next to the following statement to indicate your agreement:**

  X   I certify that I have answered every question and have not altered the wording of any of the questions on this form.



## ICMJE DISCLOSURE FORM

Date: December 16<sup>th</sup>2022

Your Name : LERUT Toni

Manuscript Title: The SUPER 2022 reporting guideline for suggested reporting of surgical technique

In the interest of transparency, we ask you to disclose all relationships/activities/interests listed below that are related to the content of your manuscript. “Related” means any relation with for-profit or not-for-profit third parties whose interests may be affected by the content of the manuscript. Disclosure represents a commitment to transparency and does not necessarily indicate a bias. If you are in doubt about whether to list a relationship/activity/interest, it is preferable that you do so.

The following questions apply to the author’s relationships/activities/interests as they relate to the current manuscript only.

The author’s relationships/activities/interests should be defined broadly. For example, if your manuscript pertains to the epidemiology of hypertension, you should declare all relationships with manufacturers of antihypertensive medication, even if that medication is not mentioned in the manuscript.

In item #1 below, report all support for the work reported in this manuscript without time limit. For all other items, the time frame for disclosure is the past 36 months.

|                                                           |                                                                                                                                                                                | Name all entities with whom you have this relationship or indicate none (add rows as needed) | Specifications/Comments (e.g., if payments were made to you or to your institution) |
|-----------------------------------------------------------|--------------------------------------------------------------------------------------------------------------------------------------------------------------------------------|----------------------------------------------------------------------------------------------|-------------------------------------------------------------------------------------|
| <b>Time frame: Since the initial planning of the work</b> |                                                                                                                                                                                |                                                                                              |                                                                                     |
| 1                                                         | All support for the present manuscript (e.g., funding, provision of study materials, medical writing, article processing charges, etc.)<br><b>No time limit for this item.</b> | None                                                                                         |                                                                                     |
|                                                           |                                                                                                                                                                                |                                                                                              |                                                                                     |
|                                                           |                                                                                                                                                                                |                                                                                              |                                                                                     |
|                                                           |                                                                                                                                                                                |                                                                                              |                                                                                     |
|                                                           |                                                                                                                                                                                |                                                                                              |                                                                                     |
|                                                           |                                                                                                                                                                                |                                                                                              |                                                                                     |
| <b>Time frame: past 36 months</b>                         |                                                                                                                                                                                |                                                                                              |                                                                                     |
| 2                                                         | Grants or contracts from any entity (if not indicated in item #1 above).                                                                                                       | None                                                                                         |                                                                                     |
|                                                           |                                                                                                                                                                                |                                                                                              |                                                                                     |
| 3                                                         | Royalties or licenses                                                                                                                                                          | None                                                                                         |                                                                                     |
|                                                           |                                                                                                                                                                                |                                                                                              |                                                                                     |
| 4                                                         | Consulting fees                                                                                                                                                                | None                                                                                         |                                                                                     |
|                                                           |                                                                                                                                                                                |                                                                                              |                                                                                     |

|    |                                                                                                              |      |  |
|----|--------------------------------------------------------------------------------------------------------------|------|--|
| 5  | Payment or honoraria for lectures, presentations, speakers bureaus, manuscript writing or educational events | None |  |
| 6  | Payment for expert testimony                                                                                 | None |  |
| 7  | Support for attending meetings and/or travel                                                                 | None |  |
| 8  | Patents planned, issued or pending                                                                           | None |  |
| 9  | Participation on a Data Safety Monitoring Board or Advisory Board                                            | None |  |
| 10 | Leadership or fiduciary role in other board, society, committee or advocacy group, paid or unpaid            | None |  |
| 11 | Stock or stock options                                                                                       | None |  |
| 12 | Receipt of equipment, materials, drugs, medical writing, gifts or other services                             | None |  |
| 13 | Other financial or non-financial interests                                                                   | None |  |

**Please summarize the above conflict of interest in the following box:**

**Please place an "X" next to the following statement to indicate your agreement:**

**X I certify that I have answered every question and have not altered the wording of any of the questions on this**

form.

A handwritten signature in black ink, appearing to be 'Lent' with a long horizontal stroke underneath.

## ICMJE DISCLOSURE FORM

Date: 31/12/2022  
 Your Name: Aung Oo  
 Manuscript Title: The SUPER 2022 reporting guideline for suggested reporting of surgical technique  
 Manuscript number (if known): HBSN-22-509-R1

In the interest of transparency, we ask you to disclose all relationships/activities/interests listed below that are related to the content of your manuscript. "Related" means any relation with for-profit or not-for-profit third parties whose interests may be affected by the content of the manuscript. Disclosure represents a commitment to transparency and does not necessarily indicate a bias. If you are in doubt about whether to list a relationship/activity/interest, it is preferable that you do so.

The following questions apply to the author's relationships/activities/interests as they relate to the current manuscript only.

The author's relationships/activities/interests should be defined broadly. For example, if your manuscript pertains to the epidemiology of hypertension, you should declare all relationships with manufacturers of antihypertensive medication, even if that medication is not mentioned in the manuscript.

In item #1 below, report all support for the work reported in this manuscript without time limit. For all other items, the time frame for disclosure is the past 36 months.

|                                                           |                                                                                                                                                                                | Name all entities with whom you have this relationship or indicate none (add rows as needed) | Specifications/Comments (e.g., if payments were made to you or to your institution) |
|-----------------------------------------------------------|--------------------------------------------------------------------------------------------------------------------------------------------------------------------------------|----------------------------------------------------------------------------------------------|-------------------------------------------------------------------------------------|
| <b>Time frame: Since the initial planning of the work</b> |                                                                                                                                                                                |                                                                                              |                                                                                     |
| 1                                                         | All support for the present manuscript (e.g., funding, provision of study materials, medical writing, article processing charges, etc.)<br><b>No time limit for this item.</b> | None                                                                                         |                                                                                     |
|                                                           |                                                                                                                                                                                |                                                                                              |                                                                                     |
|                                                           |                                                                                                                                                                                |                                                                                              |                                                                                     |
|                                                           |                                                                                                                                                                                |                                                                                              |                                                                                     |
|                                                           |                                                                                                                                                                                |                                                                                              |                                                                                     |
| <b>Time frame: past 36 months</b>                         |                                                                                                                                                                                |                                                                                              |                                                                                     |
| 2                                                         | Grants or contracts from any entity (if not indicated in item #1 above).                                                                                                       |                                                                                              | Research Grant (Terumo Aortic) to my institution                                    |
|                                                           |                                                                                                                                                                                |                                                                                              | Educational grant (Terumo Aortic) to my institution                                 |
|                                                           |                                                                                                                                                                                |                                                                                              | Educational grant (Artivion) to my institution                                      |
| 3                                                         | Royalties or licenses                                                                                                                                                          | None                                                                                         |                                                                                     |
|                                                           |                                                                                                                                                                                |                                                                                              |                                                                                     |
| 4                                                         | Consulting fees                                                                                                                                                                | None                                                                                         |                                                                                     |
|                                                           |                                                                                                                                                                                |                                                                                              |                                                                                     |

|    |                                                                                                              |      |  |
|----|--------------------------------------------------------------------------------------------------------------|------|--|
| 5  | Payment or honoraria for lectures, presentations, speakers bureaus, manuscript writing or educational events | None |  |
|    |                                                                                                              |      |  |
|    |                                                                                                              |      |  |
| 6  | Payment for expert testimony                                                                                 | None |  |
|    |                                                                                                              |      |  |
|    |                                                                                                              |      |  |
| 7  | Support for attending meetings and/or travel                                                                 | None |  |
|    |                                                                                                              |      |  |
|    |                                                                                                              |      |  |
| 8  | Patents planned, issued or pending                                                                           | None |  |
|    |                                                                                                              |      |  |
|    |                                                                                                              |      |  |
| 9  | Participation on a Data Safety Monitoring Board or Advisory Board                                            | None |  |
|    |                                                                                                              |      |  |
|    |                                                                                                              |      |  |
| 10 | Leadership or fiduciary role in other board, society, committee or advocacy group, paid or unpaid            | None |  |
|    |                                                                                                              |      |  |
|    |                                                                                                              |      |  |
| 11 | Stock or stock options                                                                                       | None |  |
|    |                                                                                                              |      |  |
|    |                                                                                                              |      |  |
| 12 | Receipt of equipment, materials, drugs, medical writing, gifts or other services                             | None |  |
|    |                                                                                                              |      |  |
|    |                                                                                                              |      |  |
| 13 | Other financial or non-financial interests                                                                   | None |  |
|    |                                                                                                              |      |  |
|    |                                                                                                              |      |  |

**Please summarize the above conflict of interest in the following box:**

Educational and research grants from Artivion and Terumo Aortic to my institution.

**Please place an "X" next to the following statement to indicate your agreement:**

  x   I certify that I have answered every question and have not altered the wording of any of the questions on this form.

## ICMJE DISCLOSURE FORM

Date: Dec 13, 2022

Your Name: Grace S Li

Manuscript Title: The SUPER 2022 reporting guideline for suggested reporting of surgical technique

Manuscript number (if known): HBSN-22-509

In the interest of transparency, we ask you to disclose all relationships/activities/interests listed below that are related to the content of your manuscript. "Related" means any relation with for-profit or not-for-profit third parties whose interests may be affected by the content of the manuscript. Disclosure represents a commitment to transparency and does not necessarily indicate a bias. If you are in doubt about whether to list a relationship/activity/interest, it is preferable that you do so.

The following questions apply to the author's relationships/activities/interests as they relate to the **current manuscript only**.

The author's relationships/activities/interests should be **defined broadly**. For example, if your manuscript pertains to the epidemiology of hypertension, you should declare all relationships with manufacturers of antihypertensive medication, even if that medication is not mentioned in the manuscript.

In item #1 below, report all support for the work reported in this manuscript without time limit. For all other items, the time frame for disclosure is the past 36 months.

|                                                           |                                                                                                                                                                                | Name all entities with whom you have this relationship or indicate none (add rows as needed) | Specifications/Comments (e.g., if payments were made to you or to your institution) |
|-----------------------------------------------------------|--------------------------------------------------------------------------------------------------------------------------------------------------------------------------------|----------------------------------------------------------------------------------------------|-------------------------------------------------------------------------------------|
| <b>Time frame: Since the initial planning of the work</b> |                                                                                                                                                                                |                                                                                              |                                                                                     |
| 1                                                         | All support for the present manuscript (e.g., funding, provision of study materials, medical writing, article processing charges, etc.)<br><b>No time limit for this item.</b> | None                                                                                         |                                                                                     |
|                                                           |                                                                                                                                                                                |                                                                                              |                                                                                     |
|                                                           |                                                                                                                                                                                |                                                                                              |                                                                                     |
|                                                           |                                                                                                                                                                                |                                                                                              |                                                                                     |
|                                                           |                                                                                                                                                                                |                                                                                              |                                                                                     |
|                                                           |                                                                                                                                                                                |                                                                                              |                                                                                     |
| <b>Time frame: past 36 months</b>                         |                                                                                                                                                                                |                                                                                              |                                                                                     |
| 2                                                         | Grants or contracts from any entity (if not indicated in item #1 above).                                                                                                       | None                                                                                         |                                                                                     |
|                                                           |                                                                                                                                                                                |                                                                                              |                                                                                     |
| 3                                                         | Royalties or licenses                                                                                                                                                          | None                                                                                         |                                                                                     |
|                                                           |                                                                                                                                                                                |                                                                                              |                                                                                     |
| 4                                                         | Consulting fees                                                                                                                                                                | None                                                                                         |                                                                                     |
|                                                           |                                                                                                                                                                                |                                                                                              |                                                                                     |
|                                                           |                                                                                                                                                                                |                                                                                              |                                                                                     |

|    |                                                                                                              |                        |                                                                                                                      |
|----|--------------------------------------------------------------------------------------------------------------|------------------------|----------------------------------------------------------------------------------------------------------------------|
| 5  | Payment or honoraria for lectures, presentations, speakers bureaus, manuscript writing or educational events | None                   |                                                                                                                      |
|    |                                                                                                              |                        |                                                                                                                      |
|    |                                                                                                              |                        |                                                                                                                      |
| 6  | Payment for expert testimony                                                                                 | None                   |                                                                                                                      |
|    |                                                                                                              |                        |                                                                                                                      |
|    |                                                                                                              |                        |                                                                                                                      |
| 7  | Support for attending meetings and/or travel                                                                 | None                   |                                                                                                                      |
|    |                                                                                                              |                        |                                                                                                                      |
|    |                                                                                                              |                        |                                                                                                                      |
| 8  | Patents planned, issued or pending                                                                           | None                   |                                                                                                                      |
|    |                                                                                                              |                        |                                                                                                                      |
|    |                                                                                                              |                        |                                                                                                                      |
| 9  | Participation on a Data Safety Monitoring Board or Advisory Board                                            | None                   |                                                                                                                      |
|    |                                                                                                              |                        |                                                                                                                      |
|    |                                                                                                              |                        |                                                                                                                      |
| 10 | Leadership or fiduciary role in other board, society, committee or advocacy group, paid or unpaid            | None                   |                                                                                                                      |
|    |                                                                                                              |                        |                                                                                                                      |
|    |                                                                                                              |                        |                                                                                                                      |
| 11 | Stock or stock options                                                                                       | None                   |                                                                                                                      |
|    |                                                                                                              |                        |                                                                                                                      |
|    |                                                                                                              |                        |                                                                                                                      |
| 12 | Receipt of equipment, materials, drugs, medical writing, gifts or other services                             | None                   |                                                                                                                      |
|    |                                                                                                              |                        |                                                                                                                      |
|    |                                                                                                              |                        |                                                                                                                      |
| 13 | Other financial or non-financial interests                                                                   | AME Publishing Company | Grace S. Li is a full-time employee of AME Publishing Company (the publisher of Hepatobiliary Surgery and Nutrition) |
|    |                                                                                                              |                        |                                                                                                                      |
|    |                                                                                                              |                        |                                                                                                                      |

**Please summarize the above conflict of interest in the following box:**

Grace S. Li is a full-time employee of AME publishing company (publisher of Hepatobiliary Surgery and Nutrition).

**Please place an "X" next to the following statement to indicate your agreement:**

I certify that I have answered every question and have not altered the wording of any of the questions on this form.



## ICMJE DISCLOSURE FORM

Date: December 13, 2022

Your Name: Xueqin Tang

Manuscript Title: The SUPER 2022 reporting guideline for suggested reporting of surgical technique

Manuscript number (if known): HBSN-22-509

In the interest of transparency, we ask you to disclose all relationships/activities/interests listed below that are related to the content of your manuscript. "Related" means any relation with for-profit or not-for-profit third parties whose interests may be affected by the content of the manuscript. Disclosure represents a commitment to transparency and does not necessarily indicate a bias. If you are in doubt about whether to list a relationship/activity/interest, it is preferable that you do so.

The following questions apply to the author's relationships/activities/interests as they relate to the current manuscript only.

The author's relationships/activities/interests should be defined broadly. For example, if your manuscript pertains to the epidemiology of hypertension, you should declare all relationships with manufacturers of antihypertensive medication, even if that medication is not mentioned in the manuscript.

In item #1 below, report all support for the work reported in this manuscript without time limit. For all other items, the time frame for disclosure is the past 36 months.

|                                                           |                                                                                                                                                                                | Name all entities with whom you have this relationship or indicate none (add rows as needed) | Specifications/Comments (e.g., if payments were made to you or to your institution) |
|-----------------------------------------------------------|--------------------------------------------------------------------------------------------------------------------------------------------------------------------------------|----------------------------------------------------------------------------------------------|-------------------------------------------------------------------------------------|
| <b>Time frame: Since the initial planning of the work</b> |                                                                                                                                                                                |                                                                                              |                                                                                     |
| 1                                                         | All support for the present manuscript (e.g., funding, provision of study materials, medical writing, article processing charges, etc.)<br><b>No time limit for this item.</b> | None                                                                                         |                                                                                     |
|                                                           |                                                                                                                                                                                |                                                                                              |                                                                                     |
|                                                           |                                                                                                                                                                                |                                                                                              |                                                                                     |
|                                                           |                                                                                                                                                                                |                                                                                              |                                                                                     |
|                                                           |                                                                                                                                                                                |                                                                                              |                                                                                     |
|                                                           |                                                                                                                                                                                |                                                                                              |                                                                                     |
|                                                           |                                                                                                                                                                                |                                                                                              |                                                                                     |
| <b>Time frame: past 36 months</b>                         |                                                                                                                                                                                |                                                                                              |                                                                                     |
| 2                                                         | Grants or contracts from any entity (if not indicated in item #1 above).                                                                                                       | None                                                                                         |                                                                                     |
|                                                           |                                                                                                                                                                                |                                                                                              |                                                                                     |
|                                                           |                                                                                                                                                                                |                                                                                              |                                                                                     |
| 3                                                         | Royalties or licenses                                                                                                                                                          | None                                                                                         |                                                                                     |
|                                                           |                                                                                                                                                                                |                                                                                              |                                                                                     |
|                                                           |                                                                                                                                                                                |                                                                                              |                                                                                     |
| 4                                                         | Consulting fees                                                                                                                                                                | None                                                                                         |                                                                                     |
|                                                           |                                                                                                                                                                                |                                                                                              |                                                                                     |
|                                                           |                                                                                                                                                                                |                                                                                              |                                                                                     |

|    |                                                                                                              |                                    |  |
|----|--------------------------------------------------------------------------------------------------------------|------------------------------------|--|
| 5  | Payment or honoraria for lectures, presentations, speakers bureaus, manuscript writing or educational events | None                               |  |
|    |                                                                                                              |                                    |  |
|    |                                                                                                              |                                    |  |
| 6  | Payment for expert testimony                                                                                 | None                               |  |
|    |                                                                                                              |                                    |  |
|    |                                                                                                              |                                    |  |
| 7  | Support for attending meetings and/or travel                                                                 | None                               |  |
|    |                                                                                                              |                                    |  |
|    |                                                                                                              |                                    |  |
| 8  | Patents planned, issued or pending                                                                           | None                               |  |
|    |                                                                                                              |                                    |  |
|    |                                                                                                              |                                    |  |
| 9  | Participation on a Data Safety Monitoring Board or Advisory Board                                            | None                               |  |
|    |                                                                                                              |                                    |  |
|    |                                                                                                              |                                    |  |
| 10 | Leadership or fiduciary role in other board, society, committee or advocacy group, paid or unpaid            | None                               |  |
|    |                                                                                                              |                                    |  |
|    |                                                                                                              |                                    |  |
| 11 | Stock or stock options                                                                                       | None                               |  |
|    |                                                                                                              |                                    |  |
|    |                                                                                                              |                                    |  |
| 12 | Receipt of equipment, materials, drugs, medical writing, gifts or other services                             | None                               |  |
|    |                                                                                                              |                                    |  |
|    |                                                                                                              |                                    |  |
| 13 | Other financial or non-financial interests                                                                   | Employee of AME Publishing Company |  |
|    |                                                                                                              |                                    |  |
|    |                                                                                                              |                                    |  |

**Please summarize the above conflict of interest in the following box:**

Xueqin Tang is from AME Publishing Company.

**Please place an "X" next to the following statement to indicate your agreement:**

**X I certify that I have answered every question and have not altered the wording of any of the questions on this form.**

## ICMJE DISCLOSURE FORM

**Date:** 12/15/2022

**Your Name:** Yawen-Lu

**Manuscript Title:** The SUPER 2022 reporting guideline for suggested reporting of surgical technique

**Manuscript Number (if known):** HBSN-22-509-R1

In the interest of transparency, we ask you to disclose all relationships/activities/interests listed below that are related to the content of your manuscript. "Related" means any relation with for-profit or not-for-profit third parties whose interests may be affected by the content of the manuscript. Disclosure represents a commitment to transparency and does not necessarily indicate a bias. If you are in doubt about whether to list a relationship/activity/interest, it is preferable that you do so.

The author's relationships/activities/interests should be defined broadly. For example, if your manuscript pertains to the epidemiology of hypertension, you should declare all relationships with manufacturers of antihypertensive medication, even if that medication is not mentioned in the manuscript.

In item #1 below, report all support for the work reported in this manuscript without time limit. For all other items, the time frame for disclosure is the past 36 months.

|                                                    | Name all entities with whom you have this relationship or indicate none (add rows as needed)                                                                                   | Specifications/Comments (e.g., if payments were made to you or to your institution)                                                                                                                                                                                                                                                        |  |  |  |  |  |  |
|----------------------------------------------------|--------------------------------------------------------------------------------------------------------------------------------------------------------------------------------|--------------------------------------------------------------------------------------------------------------------------------------------------------------------------------------------------------------------------------------------------------------------------------------------------------------------------------------------|--|--|--|--|--|--|
| Time frame: Since the initial planning of the work |                                                                                                                                                                                |                                                                                                                                                                                                                                                                                                                                            |  |  |  |  |  |  |
| <b>1</b>                                           | All support for the present manuscript (e.g., funding, provision of study materials, medical writing, article processing charges, etc.)<br><b>No time limit for this item.</b> | <input type="checkbox"/> <b>None</b><br><table border="1" style="width: 100%; height: 40px; margin-top: 5px;"> <tr><td style="width: 60%;"></td><td></td></tr> <tr><td></td><td></td></tr> <tr><td></td><td></td></tr> </table> <p style="font-size: small; color: gray; text-align: right;">Click the tab key to add additional rows.</p> |  |  |  |  |  |  |
|                                                    |                                                                                                                                                                                |                                                                                                                                                                                                                                                                                                                                            |  |  |  |  |  |  |
|                                                    |                                                                                                                                                                                |                                                                                                                                                                                                                                                                                                                                            |  |  |  |  |  |  |
|                                                    |                                                                                                                                                                                |                                                                                                                                                                                                                                                                                                                                            |  |  |  |  |  |  |
| Time frame: past 36 months                         |                                                                                                                                                                                |                                                                                                                                                                                                                                                                                                                                            |  |  |  |  |  |  |
| <b>2</b>                                           | Grants or contracts from any entity (if not indicated in item #1 above).                                                                                                       | <input type="checkbox"/> <b>None</b><br><table border="1" style="width: 100%; height: 40px; margin-top: 5px;"> <tr><td style="width: 60%;"></td><td></td></tr> <tr><td></td><td></td></tr> <tr><td></td><td></td></tr> </table>                                                                                                            |  |  |  |  |  |  |
|                                                    |                                                                                                                                                                                |                                                                                                                                                                                                                                                                                                                                            |  |  |  |  |  |  |
|                                                    |                                                                                                                                                                                |                                                                                                                                                                                                                                                                                                                                            |  |  |  |  |  |  |
|                                                    |                                                                                                                                                                                |                                                                                                                                                                                                                                                                                                                                            |  |  |  |  |  |  |
| <b>3</b>                                           | Royalties or licenses                                                                                                                                                          | <input type="checkbox"/> <b>None</b><br><table border="1" style="width: 100%; height: 40px; margin-top: 5px;"> <tr><td style="width: 60%;"></td><td></td></tr> <tr><td></td><td></td></tr> <tr><td></td><td></td></tr> </table>                                                                                                            |  |  |  |  |  |  |
|                                                    |                                                                                                                                                                                |                                                                                                                                                                                                                                                                                                                                            |  |  |  |  |  |  |
|                                                    |                                                                                                                                                                                |                                                                                                                                                                                                                                                                                                                                            |  |  |  |  |  |  |
|                                                    |                                                                                                                                                                                |                                                                                                                                                                                                                                                                                                                                            |  |  |  |  |  |  |

|           |                                                                                                              | Name all entities with whom you have this relationship or indicate none (add rows as needed)                                                     | Specifications/Comments (e.g., if payments were made to you or to your institution) |  |  |  |  |  |  |
|-----------|--------------------------------------------------------------------------------------------------------------|--------------------------------------------------------------------------------------------------------------------------------------------------|-------------------------------------------------------------------------------------|--|--|--|--|--|--|
| <b>4</b>  | Consulting fees                                                                                              | <input type="checkbox"/> None<br><table border="1"> <tr><td></td><td></td></tr> <tr><td></td><td></td></tr> <tr><td></td><td></td></tr> </table> |                                                                                     |  |  |  |  |  |  |
|           |                                                                                                              |                                                                                                                                                  |                                                                                     |  |  |  |  |  |  |
|           |                                                                                                              |                                                                                                                                                  |                                                                                     |  |  |  |  |  |  |
|           |                                                                                                              |                                                                                                                                                  |                                                                                     |  |  |  |  |  |  |
| <b>5</b>  | Payment or honoraria for lectures, presentations, speakers bureaus, manuscript writing or educational events | <input type="checkbox"/> None<br><table border="1"> <tr><td></td><td></td></tr> <tr><td></td><td></td></tr> <tr><td></td><td></td></tr> </table> |                                                                                     |  |  |  |  |  |  |
|           |                                                                                                              |                                                                                                                                                  |                                                                                     |  |  |  |  |  |  |
|           |                                                                                                              |                                                                                                                                                  |                                                                                     |  |  |  |  |  |  |
|           |                                                                                                              |                                                                                                                                                  |                                                                                     |  |  |  |  |  |  |
| <b>6</b>  | Payment for expert testimony                                                                                 | <input type="checkbox"/> None<br><table border="1"> <tr><td></td><td></td></tr> <tr><td></td><td></td></tr> <tr><td></td><td></td></tr> </table> |                                                                                     |  |  |  |  |  |  |
|           |                                                                                                              |                                                                                                                                                  |                                                                                     |  |  |  |  |  |  |
|           |                                                                                                              |                                                                                                                                                  |                                                                                     |  |  |  |  |  |  |
|           |                                                                                                              |                                                                                                                                                  |                                                                                     |  |  |  |  |  |  |
| <b>7</b>  | Support for attending meetings and/or travel                                                                 | <input type="checkbox"/> None<br><table border="1"> <tr><td></td><td></td></tr> <tr><td></td><td></td></tr> <tr><td></td><td></td></tr> </table> |                                                                                     |  |  |  |  |  |  |
|           |                                                                                                              |                                                                                                                                                  |                                                                                     |  |  |  |  |  |  |
|           |                                                                                                              |                                                                                                                                                  |                                                                                     |  |  |  |  |  |  |
|           |                                                                                                              |                                                                                                                                                  |                                                                                     |  |  |  |  |  |  |
| <b>8</b>  | Patents planned, issued or pending                                                                           | <input type="checkbox"/> None<br><table border="1"> <tr><td></td><td></td></tr> <tr><td></td><td></td></tr> <tr><td></td><td></td></tr> </table> |                                                                                     |  |  |  |  |  |  |
|           |                                                                                                              |                                                                                                                                                  |                                                                                     |  |  |  |  |  |  |
|           |                                                                                                              |                                                                                                                                                  |                                                                                     |  |  |  |  |  |  |
|           |                                                                                                              |                                                                                                                                                  |                                                                                     |  |  |  |  |  |  |
| <b>9</b>  | Participation on a Data Safety Monitoring Board or Advisory Board                                            | <input type="checkbox"/> None<br><table border="1"> <tr><td></td><td></td></tr> <tr><td></td><td></td></tr> <tr><td></td><td></td></tr> </table> |                                                                                     |  |  |  |  |  |  |
|           |                                                                                                              |                                                                                                                                                  |                                                                                     |  |  |  |  |  |  |
|           |                                                                                                              |                                                                                                                                                  |                                                                                     |  |  |  |  |  |  |
|           |                                                                                                              |                                                                                                                                                  |                                                                                     |  |  |  |  |  |  |
| <b>10</b> | Leadership or fiduciary role in other board, society, committee or advocacy group, paid or unpaid            | <input type="checkbox"/> None<br><table border="1"> <tr><td></td><td></td></tr> <tr><td></td><td></td></tr> <tr><td></td><td></td></tr> </table> |                                                                                     |  |  |  |  |  |  |
|           |                                                                                                              |                                                                                                                                                  |                                                                                     |  |  |  |  |  |  |
|           |                                                                                                              |                                                                                                                                                  |                                                                                     |  |  |  |  |  |  |
|           |                                                                                                              |                                                                                                                                                  |                                                                                     |  |  |  |  |  |  |

|    |                                                                                  | Name all entities with whom you have this relationship or indicate none (add rows as needed) | Specifications/Comments (e.g., if payments were made to you or to your institution) |
|----|----------------------------------------------------------------------------------|----------------------------------------------------------------------------------------------|-------------------------------------------------------------------------------------|
| 11 | Stock or stock options                                                           | <input type="checkbox"/> None                                                                |                                                                                     |
|    |                                                                                  | <input type="text"/>                                                                         | <input type="text"/>                                                                |
|    |                                                                                  | <input type="text"/>                                                                         | <input type="text"/>                                                                |
|    |                                                                                  | <input type="text"/>                                                                         | <input type="text"/>                                                                |
| 12 | Receipt of equipment, materials, drugs, medical writing, gifts or other services | <input type="checkbox"/> None                                                                |                                                                                     |
|    |                                                                                  | <input type="text"/>                                                                         | <input type="text"/>                                                                |
|    |                                                                                  | <input type="text"/>                                                                         | <input type="text"/>                                                                |
|    |                                                                                  | <input type="text"/>                                                                         | <input type="text"/>                                                                |
| 13 | Other financial or non-financial interests                                       | <input type="checkbox"/> None                                                                |                                                                                     |
|    |                                                                                  | <input type="text"/>                                                                         | <input type="text"/>                                                                |
|    |                                                                                  | <input type="text"/>                                                                         | <input type="text"/>                                                                |
|    |                                                                                  | <input type="text"/>                                                                         | <input type="text"/>                                                                |

Please place an "X" next to the following statement to indicate your agreement:

I certify that I have answered every question and have not altered the wording of any of the questions on this form.

## ICMJE DISCLOSURE FORM

**Date:** 13 December 2022

**Your Name:** Hussein Elkhayat

**Manuscript Title:** The SUPER 2022 reporting guideline for suggested reporting of surgical technique

**Manuscript number (if known):** HBSN-22-509-R1

In the interest of transparency, we ask you to disclose all relationships/activities/interests listed below that are related to the content of your manuscript. "Related" means any relation with for-profit or not-for-profit third parties whose interests may be affected by the content of the manuscript. Disclosure represents a commitment to transparency and does not necessarily indicate a bias. If you are in doubt about whether to list a relationship/activity/interest, it is preferable that you do so.

The following questions apply to the author's relationships/activities/interests as they relate to the current manuscript only.

The author's relationships/activities/interests should be defined broadly. For example, if your manuscript pertains to the epidemiology of hypertension, you should declare all relationships with manufacturers of antihypertensive medication, even if that medication is not mentioned in the manuscript.

In item #1 below, report all support for the work reported in this manuscript without time limit. For all other items, the time frame for disclosure is the past 36 months.

|                                                           |                                                                                                                                                                                | Name all entities with whom you have this relationship or indicate none (add rows as needed) | Specifications/Comments (e.g., if payments were made to you or to your institution) |
|-----------------------------------------------------------|--------------------------------------------------------------------------------------------------------------------------------------------------------------------------------|----------------------------------------------------------------------------------------------|-------------------------------------------------------------------------------------|
| <b>Time frame: Since the initial planning of the work</b> |                                                                                                                                                                                |                                                                                              |                                                                                     |
| 1                                                         | All support for the present manuscript (e.g., funding, provision of study materials, medical writing, article processing charges, etc.)<br><b>No time limit for this item.</b> | None                                                                                         |                                                                                     |
|                                                           |                                                                                                                                                                                |                                                                                              |                                                                                     |
|                                                           |                                                                                                                                                                                |                                                                                              |                                                                                     |
|                                                           |                                                                                                                                                                                |                                                                                              |                                                                                     |
|                                                           |                                                                                                                                                                                |                                                                                              |                                                                                     |
|                                                           |                                                                                                                                                                                |                                                                                              |                                                                                     |
| <b>Time frame: past 36 months</b>                         |                                                                                                                                                                                |                                                                                              |                                                                                     |
| 2                                                         | Grants or contracts from any entity (if not indicated in item #1 above).                                                                                                       | None                                                                                         |                                                                                     |
|                                                           |                                                                                                                                                                                |                                                                                              |                                                                                     |
| 3                                                         | Royalties or licenses                                                                                                                                                          | None                                                                                         |                                                                                     |
|                                                           |                                                                                                                                                                                |                                                                                              |                                                                                     |
| 4                                                         | Consulting fees                                                                                                                                                                | None                                                                                         |                                                                                     |
|                                                           |                                                                                                                                                                                |                                                                                              |                                                                                     |
|                                                           |                                                                                                                                                                                |                                                                                              |                                                                                     |

|    |                                                                                                              |      |  |
|----|--------------------------------------------------------------------------------------------------------------|------|--|
| 5  | Payment or honoraria for lectures, presentations, speakers bureaus, manuscript writing or educational events | None |  |
|    |                                                                                                              |      |  |
|    |                                                                                                              |      |  |
| 6  | Payment for expert testimony                                                                                 | None |  |
|    |                                                                                                              |      |  |
|    |                                                                                                              |      |  |
| 7  | Support for attending meetings and/or travel                                                                 | None |  |
|    |                                                                                                              |      |  |
|    |                                                                                                              |      |  |
| 8  | Patents planned, issued or pending                                                                           | None |  |
|    |                                                                                                              |      |  |
|    |                                                                                                              |      |  |
| 9  | Participation on a Data Safety Monitoring Board or Advisory Board                                            | None |  |
|    |                                                                                                              |      |  |
|    |                                                                                                              |      |  |
| 10 | Leadership or fiduciary role in other board, society, committee or advocacy group, paid or unpaid            | None |  |
|    |                                                                                                              |      |  |
|    |                                                                                                              |      |  |
| 11 | Stock or stock options                                                                                       | None |  |
|    |                                                                                                              |      |  |
|    |                                                                                                              |      |  |
| 12 | Receipt of equipment, materials, drugs, medical writing, gifts or other services                             | None |  |
|    |                                                                                                              |      |  |
|    |                                                                                                              |      |  |
| 13 | Other financial or non-financial interests                                                                   | None |  |
|    |                                                                                                              |      |  |
|    |                                                                                                              |      |  |

**Please summarize the above conflict of interest in the following box:**

|                                   |
|-----------------------------------|
| I declare no conflict of interest |
|-----------------------------------|

**Please place an "X" next to the following statement to indicate your agreement:**

**X** I certify that I have answered every question and have not altered the wording of any of the questions on this form.

## ICMJE DISCLOSURE FORM

Date: 26<sup>th</sup> Dec 2022  
 Your Name: Tomaž Štupnik  
 Manuscript Title: The SUPER 2022 reporting guideline for suggested reporting of surgical technique  
 Manuscript number (if known): HBSN-22-509-R1

In the interest of transparency, we ask you to disclose all relationships/activities/interests listed below that are related to the content of your manuscript. "Related" means any relation with for-profit or not-for-profit third parties whose interests may be affected by the content of the manuscript. Disclosure represents a commitment to transparency and does not necessarily indicate a bias. If you are in doubt about whether to list a relationship/activity/interest, it is preferable that you do so.

The following questions apply to the author's relationships/activities/interests as they relate to the current manuscript only.

The author's relationships/activities/interests should be defined broadly. For example, if your manuscript pertains to the epidemiology of hypertension, you should declare all relationships with manufacturers of antihypertensive medication, even if that medication is not mentioned in the manuscript.

In item #1 below, report all support for the work reported in this manuscript without time limit. For all other items, the time frame for disclosure is the past 36 months.

|                                                           |                                                                                                                                                                                | Name all entities with whom you have this relationship or indicate none (add rows as needed) | Specifications/Comments (e.g., if payments were made to you or to your institution) |
|-----------------------------------------------------------|--------------------------------------------------------------------------------------------------------------------------------------------------------------------------------|----------------------------------------------------------------------------------------------|-------------------------------------------------------------------------------------|
| <b>Time frame: Since the initial planning of the work</b> |                                                                                                                                                                                |                                                                                              |                                                                                     |
| 1                                                         | All support for the present manuscript (e.g., funding, provision of study materials, medical writing, article processing charges, etc.)<br><b>No time limit for this item.</b> | None                                                                                         |                                                                                     |
|                                                           |                                                                                                                                                                                |                                                                                              |                                                                                     |
|                                                           |                                                                                                                                                                                |                                                                                              |                                                                                     |
|                                                           |                                                                                                                                                                                |                                                                                              |                                                                                     |
|                                                           |                                                                                                                                                                                |                                                                                              |                                                                                     |
| <b>Time frame: past 36 months</b>                         |                                                                                                                                                                                |                                                                                              |                                                                                     |
| 2                                                         | Grants or contracts from any entity (if not indicated in item #1 above).                                                                                                       | None                                                                                         |                                                                                     |
|                                                           |                                                                                                                                                                                |                                                                                              |                                                                                     |
| 3                                                         | Royalties or licenses                                                                                                                                                          | None                                                                                         |                                                                                     |
|                                                           |                                                                                                                                                                                |                                                                                              |                                                                                     |
| 4                                                         | Consulting fees                                                                                                                                                                | None                                                                                         |                                                                                     |
|                                                           |                                                                                                                                                                                |                                                                                              |                                                                                     |
|                                                           |                                                                                                                                                                                |                                                                                              |                                                                                     |



|    |                                                                                                              |      |  |
|----|--------------------------------------------------------------------------------------------------------------|------|--|
| 5  | Payment or honoraria for lectures, presentations, speakers bureaus, manuscript writing or educational events | None |  |
| 6  | Payment for expert testimony                                                                                 | None |  |
| 7  | Support for attending meetings and/or travel                                                                 | None |  |
| 8  | Patents planned, issued or pending                                                                           | None |  |
| 9  | Participation on a Data Safety Monitoring Board or Advisory Board                                            | None |  |
| 10 | Leadership or fiduciary role in other board, society, committee or advocacy group, paid or unpaid            | None |  |
| 11 | Stock or stock options                                                                                       | None |  |
| 12 | Receipt of equipment, materials, drugs, medical writing, gifts or other services                             | None |  |
| 13 | Other financial or non-financial interests                                                                   | None |  |

**Please summarize the above conflict of interest in the following box:**

none

**Please place an "X" next to the following statement to indicate your agreement:**

**I certify that I have answered every question and have not altered the wording of any of the questions on this form.**

## ICMJJE DISCLOSURE FORM

Date 14.12.2022: \_\_\_\_\_

Your Name: Tanel Laisaar

Manuscript Title: The SUPER 2022 reporting guideline for suggested reporting of surgical technique

Manuscript number (if known): HBSN-22-509-R1

In the interest of transparency, we ask you to disclose all relationships/activities/interests listed below that are related to the content of your manuscript. "Related" means any relation with for-profit or not-for-profit third parties whose interests may be affected by the content of the manuscript. Disclosure represents a commitment to transparency and does not necessarily indicate a bias. If you are in doubt about whether to list a relationship/activity/interest, it is preferable that you do so.

The following questions apply to the author's relationships/activities/interests as they relate to the **current manuscript only**.

The author's relationships/activities/interests should be **defined broadly**. For example, if your manuscript pertains to the epidemiology of hypertension, you should declare all relationships with manufacturers of antihypertensive medication, even if that medication is not mentioned in the manuscript.

In item #1 below, report all support for the work reported in this manuscript without time limit. For all other items, the time frame for disclosure is the past 36 months.

|                                                           |                                                                                                                                                                                | Name all entities with whom you have this relationship or indicate none (add rows as needed) | Specifications/Comments (e.g., if payments were made to you or to your institution) |
|-----------------------------------------------------------|--------------------------------------------------------------------------------------------------------------------------------------------------------------------------------|----------------------------------------------------------------------------------------------|-------------------------------------------------------------------------------------|
| <b>Time frame: Since the initial planning of the work</b> |                                                                                                                                                                                |                                                                                              |                                                                                     |
| 1                                                         | All support for the present manuscript (e.g., funding, provision of study materials, medical writing, article processing charges, etc.)<br><b>No time limit for this item.</b> | None                                                                                         |                                                                                     |
|                                                           |                                                                                                                                                                                |                                                                                              |                                                                                     |
|                                                           |                                                                                                                                                                                |                                                                                              |                                                                                     |
|                                                           |                                                                                                                                                                                |                                                                                              |                                                                                     |
|                                                           |                                                                                                                                                                                |                                                                                              |                                                                                     |
|                                                           |                                                                                                                                                                                |                                                                                              |                                                                                     |
| <b>Time frame: past 36 months</b>                         |                                                                                                                                                                                |                                                                                              |                                                                                     |
| 2                                                         | Grants or contracts from any entity (if not indicated in item #1 above).                                                                                                       | None                                                                                         |                                                                                     |
|                                                           |                                                                                                                                                                                |                                                                                              |                                                                                     |
| 3                                                         | Royalties or licenses                                                                                                                                                          | None                                                                                         |                                                                                     |
|                                                           |                                                                                                                                                                                |                                                                                              |                                                                                     |
| 4                                                         | Consulting fees                                                                                                                                                                | None                                                                                         |                                                                                     |
|                                                           |                                                                                                                                                                                |                                                                                              |                                                                                     |
|                                                           |                                                                                                                                                                                |                                                                                              |                                                                                     |

|    |                                                                                                              |      |  |
|----|--------------------------------------------------------------------------------------------------------------|------|--|
| 5  | Payment or honoraria for lectures, presentations, speakers bureaus, manuscript writing or educational events | None |  |
| 6  | Payment for expert testimony                                                                                 | None |  |
| 7  | Support for attending meetings and/or travel                                                                 | None |  |
| 8  | Patents planned, issued or pending                                                                           | None |  |
| 9  | Participation on a Data Safety Monitoring Board or Advisory Board                                            | None |  |
| 10 | Leadership or fiduciary role in other board, society, committee or advocacy group, paid or unpaid            | None |  |
| 11 | Stock or stock options                                                                                       | None |  |
| 12 | Receipt of equipment, materials, drugs, medical writing, gifts or other services                             | None |  |
| 13 | Other financial or non-financial interests                                                                   | None |  |

Please summarize the above conflict of interest in the following box:

I have no conflicts of interest to declare

Please place an "X" next to the following statement to indicate your agreement:

I certify that I have answered every question and have not altered the wording of any of the questions on this form.

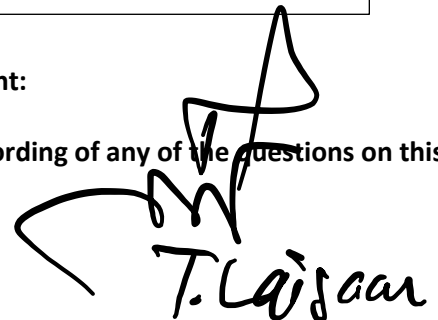

T. Laisaar

## ICMJE DISCLOSURE FORM

**Date:** 12/14/2022

**Your Name:** Firas Abu Akar

**Manuscript Title:** The SUPER 2022 reporting guideline for suggested reporting of surgical technique

**Manuscript Number (if known):** HBSN-22-509-R1

In the interest of transparency, we ask you to disclose all relationships/activities/interests listed below that are related to the content of your manuscript. "Related" means any relation with for-profit or not-for-profit third parties whose interests may be affected by the content of the manuscript. Disclosure represents a commitment to transparency and does not necessarily indicate a bias. If you are in doubt about whether to list a relationship/activity/interest, it is preferable that you do so.

The author's relationships/activities/interests should be defined broadly. For example, if your manuscript pertains to the epidemiology of hypertension, you should declare all relationships with manufacturers of antihypertensive medication, even if that medication is not mentioned in the manuscript.

In item #1 below, report all support for the work reported in this manuscript without time limit. For all other items, the time frame for disclosure is the past 36 months.

|                                                    | Name all entities with whom you have this relationship or indicate none (add rows as needed)                                                                                   | Specifications/Comments (e.g., if payments were made to you or to your institution)                                                                                                                                                                                                                                                                   |  |  |  |  |  |  |
|----------------------------------------------------|--------------------------------------------------------------------------------------------------------------------------------------------------------------------------------|-------------------------------------------------------------------------------------------------------------------------------------------------------------------------------------------------------------------------------------------------------------------------------------------------------------------------------------------------------|--|--|--|--|--|--|
| Time frame: Since the initial planning of the work |                                                                                                                                                                                |                                                                                                                                                                                                                                                                                                                                                       |  |  |  |  |  |  |
| <b>1</b>                                           | All support for the present manuscript (e.g., funding, provision of study materials, medical writing, article processing charges, etc.)<br><b>No time limit for this item.</b> | <input checked="" type="checkbox"/> <b>None</b><br><table border="1" style="width: 100%; height: 40px; margin-top: 5px;"> <tr><td style="width: 60%;"></td><td></td></tr> <tr><td></td><td></td></tr> <tr><td></td><td></td></tr> </table> <p style="font-size: small; color: gray; text-align: right;">Click the tab key to add additional rows.</p> |  |  |  |  |  |  |
|                                                    |                                                                                                                                                                                |                                                                                                                                                                                                                                                                                                                                                       |  |  |  |  |  |  |
|                                                    |                                                                                                                                                                                |                                                                                                                                                                                                                                                                                                                                                       |  |  |  |  |  |  |
|                                                    |                                                                                                                                                                                |                                                                                                                                                                                                                                                                                                                                                       |  |  |  |  |  |  |
| Time frame: past 36 months                         |                                                                                                                                                                                |                                                                                                                                                                                                                                                                                                                                                       |  |  |  |  |  |  |
| <b>2</b>                                           | Grants or contracts from any entity (if not indicated in item #1 above).                                                                                                       | <input checked="" type="checkbox"/> <b>None</b><br><table border="1" style="width: 100%; height: 40px; margin-top: 5px;"> <tr><td style="width: 60%;"></td><td></td></tr> <tr><td></td><td></td></tr> <tr><td></td><td></td></tr> </table>                                                                                                            |  |  |  |  |  |  |
|                                                    |                                                                                                                                                                                |                                                                                                                                                                                                                                                                                                                                                       |  |  |  |  |  |  |
|                                                    |                                                                                                                                                                                |                                                                                                                                                                                                                                                                                                                                                       |  |  |  |  |  |  |
|                                                    |                                                                                                                                                                                |                                                                                                                                                                                                                                                                                                                                                       |  |  |  |  |  |  |
| <b>3</b>                                           | Royalties or licenses                                                                                                                                                          | <input checked="" type="checkbox"/> <b>None</b><br><table border="1" style="width: 100%; height: 40px; margin-top: 5px;"> <tr><td style="width: 60%;"></td><td></td></tr> <tr><td></td><td></td></tr> <tr><td></td><td></td></tr> </table>                                                                                                            |  |  |  |  |  |  |
|                                                    |                                                                                                                                                                                |                                                                                                                                                                                                                                                                                                                                                       |  |  |  |  |  |  |
|                                                    |                                                                                                                                                                                |                                                                                                                                                                                                                                                                                                                                                       |  |  |  |  |  |  |
|                                                    |                                                                                                                                                                                |                                                                                                                                                                                                                                                                                                                                                       |  |  |  |  |  |  |

|    |                                                                                                              | Name all entities with whom you have this relationship or indicate none (add rows as needed)                                                                                                                                                                                                                                                                           | Specifications/Comments (e.g., if payments were made to you or to your institution) |  |  |  |  |  |  |  |  |
|----|--------------------------------------------------------------------------------------------------------------|------------------------------------------------------------------------------------------------------------------------------------------------------------------------------------------------------------------------------------------------------------------------------------------------------------------------------------------------------------------------|-------------------------------------------------------------------------------------|--|--|--|--|--|--|--|--|
| 4  | Consulting fees                                                                                              | <input checked="" type="checkbox"/> <b>None</b><br><table border="1" style="width: 100%; border-collapse: collapse;"> <tr><td style="width: 50%; height: 15px;"></td><td style="width: 50%;"></td></tr> <tr><td style="height: 15px;"></td><td></td></tr> <tr><td style="height: 15px;"></td><td></td></tr> <tr><td style="height: 15px;"></td><td></td></tr> </table> |                                                                                     |  |  |  |  |  |  |  |  |
|    |                                                                                                              |                                                                                                                                                                                                                                                                                                                                                                        |                                                                                     |  |  |  |  |  |  |  |  |
|    |                                                                                                              |                                                                                                                                                                                                                                                                                                                                                                        |                                                                                     |  |  |  |  |  |  |  |  |
|    |                                                                                                              |                                                                                                                                                                                                                                                                                                                                                                        |                                                                                     |  |  |  |  |  |  |  |  |
|    |                                                                                                              |                                                                                                                                                                                                                                                                                                                                                                        |                                                                                     |  |  |  |  |  |  |  |  |
| 5  | Payment or honoraria for lectures, presentations, speakers bureaus, manuscript writing or educational events | <input checked="" type="checkbox"/> <b>None</b><br><table border="1" style="width: 100%; border-collapse: collapse;"> <tr><td style="width: 50%; height: 15px;"></td><td style="width: 50%;"></td></tr> <tr><td style="height: 15px;"></td><td></td></tr> <tr><td style="height: 15px;"></td><td></td></tr> </table>                                                   |                                                                                     |  |  |  |  |  |  |  |  |
|    |                                                                                                              |                                                                                                                                                                                                                                                                                                                                                                        |                                                                                     |  |  |  |  |  |  |  |  |
|    |                                                                                                              |                                                                                                                                                                                                                                                                                                                                                                        |                                                                                     |  |  |  |  |  |  |  |  |
|    |                                                                                                              |                                                                                                                                                                                                                                                                                                                                                                        |                                                                                     |  |  |  |  |  |  |  |  |
| 6  | Payment for expert testimony                                                                                 | <input checked="" type="checkbox"/> <b>None</b><br><table border="1" style="width: 100%; border-collapse: collapse;"> <tr><td style="width: 50%; height: 15px;"></td><td style="width: 50%;"></td></tr> <tr><td style="height: 15px;"></td><td></td></tr> <tr><td style="height: 15px;"></td><td></td></tr> </table>                                                   |                                                                                     |  |  |  |  |  |  |  |  |
|    |                                                                                                              |                                                                                                                                                                                                                                                                                                                                                                        |                                                                                     |  |  |  |  |  |  |  |  |
|    |                                                                                                              |                                                                                                                                                                                                                                                                                                                                                                        |                                                                                     |  |  |  |  |  |  |  |  |
|    |                                                                                                              |                                                                                                                                                                                                                                                                                                                                                                        |                                                                                     |  |  |  |  |  |  |  |  |
| 7  | Support for attending meetings and/or travel                                                                 | <input checked="" type="checkbox"/> <b>None</b><br><table border="1" style="width: 100%; border-collapse: collapse;"> <tr><td style="width: 50%; height: 15px;"></td><td style="width: 50%;"></td></tr> <tr><td style="height: 15px;"></td><td></td></tr> <tr><td style="height: 15px;"></td><td></td></tr> </table>                                                   |                                                                                     |  |  |  |  |  |  |  |  |
|    |                                                                                                              |                                                                                                                                                                                                                                                                                                                                                                        |                                                                                     |  |  |  |  |  |  |  |  |
|    |                                                                                                              |                                                                                                                                                                                                                                                                                                                                                                        |                                                                                     |  |  |  |  |  |  |  |  |
|    |                                                                                                              |                                                                                                                                                                                                                                                                                                                                                                        |                                                                                     |  |  |  |  |  |  |  |  |
| 8  | Patents planned, issued or pending                                                                           | <input checked="" type="checkbox"/> <b>None</b><br><table border="1" style="width: 100%; border-collapse: collapse;"> <tr><td style="width: 50%; height: 15px;"></td><td style="width: 50%;"></td></tr> <tr><td style="height: 15px;"></td><td></td></tr> <tr><td style="height: 15px;"></td><td></td></tr> </table>                                                   |                                                                                     |  |  |  |  |  |  |  |  |
|    |                                                                                                              |                                                                                                                                                                                                                                                                                                                                                                        |                                                                                     |  |  |  |  |  |  |  |  |
|    |                                                                                                              |                                                                                                                                                                                                                                                                                                                                                                        |                                                                                     |  |  |  |  |  |  |  |  |
|    |                                                                                                              |                                                                                                                                                                                                                                                                                                                                                                        |                                                                                     |  |  |  |  |  |  |  |  |
| 9  | Participation on a Data Safety Monitoring Board or Advisory Board                                            | <input checked="" type="checkbox"/> <b>None</b><br><table border="1" style="width: 100%; border-collapse: collapse;"> <tr><td style="width: 50%; height: 15px;"></td><td style="width: 50%;"></td></tr> <tr><td style="height: 15px;"></td><td></td></tr> <tr><td style="height: 15px;"></td><td></td></tr> </table>                                                   |                                                                                     |  |  |  |  |  |  |  |  |
|    |                                                                                                              |                                                                                                                                                                                                                                                                                                                                                                        |                                                                                     |  |  |  |  |  |  |  |  |
|    |                                                                                                              |                                                                                                                                                                                                                                                                                                                                                                        |                                                                                     |  |  |  |  |  |  |  |  |
|    |                                                                                                              |                                                                                                                                                                                                                                                                                                                                                                        |                                                                                     |  |  |  |  |  |  |  |  |
| 10 | Leadership or fiduciary role in other board, society, committee or advocacy group, paid or unpaid            | <input checked="" type="checkbox"/> <b>None</b><br><table border="1" style="width: 100%; border-collapse: collapse;"> <tr><td style="width: 50%; height: 15px;"></td><td style="width: 50%;"></td></tr> <tr><td style="height: 15px;"></td><td></td></tr> <tr><td style="height: 15px;"></td><td></td></tr> </table>                                                   |                                                                                     |  |  |  |  |  |  |  |  |
|    |                                                                                                              |                                                                                                                                                                                                                                                                                                                                                                        |                                                                                     |  |  |  |  |  |  |  |  |
|    |                                                                                                              |                                                                                                                                                                                                                                                                                                                                                                        |                                                                                     |  |  |  |  |  |  |  |  |
|    |                                                                                                              |                                                                                                                                                                                                                                                                                                                                                                        |                                                                                     |  |  |  |  |  |  |  |  |

|           |                                                                                  | Name all entities with whom you have this relationship or indicate none (add rows as needed) | Specifications/Comments (e.g., if payments were made to you or to your institution) |
|-----------|----------------------------------------------------------------------------------|----------------------------------------------------------------------------------------------|-------------------------------------------------------------------------------------|
| <b>11</b> | Stock or stock options                                                           | <input checked="" type="checkbox"/> <b>None</b>                                              |                                                                                     |
|           |                                                                                  |                                                                                              |                                                                                     |
|           |                                                                                  |                                                                                              |                                                                                     |
| <b>12</b> | Receipt of equipment, materials, drugs, medical writing, gifts or other services | <input checked="" type="checkbox"/> <b>None</b>                                              |                                                                                     |
|           |                                                                                  |                                                                                              |                                                                                     |
|           |                                                                                  |                                                                                              |                                                                                     |
| <b>13</b> | Other financial or non-financial interests                                       | <input checked="" type="checkbox"/> <b>None</b>                                              |                                                                                     |
|           |                                                                                  |                                                                                              |                                                                                     |
|           |                                                                                  |                                                                                              |                                                                                     |

**Please place an "X" next to the following statement to indicate your agreement:**

I certify that I have answered every question and have not altered the wording of any of the questions on this form.

## ICMJE DISCLOSURE FORM

Date: \_\_\_\_\_ 14 DECEMBER 2022

Your Name: \_\_\_\_\_ DIEGO GONZALEZ RIVAS

Manuscript Title: \_\_\_\_\_

Manuscript number (if known): \_\_\_\_\_

In the interest of transparency, we ask you to disclose all relationships/activities/interests listed below that are related to the content of your manuscript. “Related” means any relation with for-profit or not-for-profit third parties whose interests may be affected by the content of the manuscript. Disclosure represents a commitment to transparency and does not necessarily indicate a bias. If you are in doubt about whether to list a relationship/activity/interest, it is preferable that you do so.

The following questions apply to the author’s relationships/activities/interests as they relate to the current manuscript only.

The author’s relationships/activities/interests should be defined broadly. For example, if your manuscript pertains to the epidemiology of hypertension, you should declare all relationships with manufacturers of antihypertensive medication, even if that medication is not mentioned in the manuscript.

In item #1 below, report all support for the work reported in this manuscript without time limit. For all other items, the time frame for disclosure is the past 36 months.

|                                                           |                                                                                                                                                                                | Name all entities with whom you have this relationship or indicate none (add rows as needed) | Specifications/Comments (e.g., if payments were made to you or to your institution) |
|-----------------------------------------------------------|--------------------------------------------------------------------------------------------------------------------------------------------------------------------------------|----------------------------------------------------------------------------------------------|-------------------------------------------------------------------------------------|
| <b>Time frame: Since the initial planning of the work</b> |                                                                                                                                                                                |                                                                                              |                                                                                     |
| 1                                                         | All support for the present manuscript (e.g., funding, provision of study materials, medical writing, article processing charges, etc.)<br><b>No time limit for this item.</b> | None                                                                                         |                                                                                     |
|                                                           |                                                                                                                                                                                |                                                                                              |                                                                                     |
|                                                           |                                                                                                                                                                                |                                                                                              |                                                                                     |
|                                                           |                                                                                                                                                                                |                                                                                              |                                                                                     |
|                                                           |                                                                                                                                                                                |                                                                                              |                                                                                     |
|                                                           |                                                                                                                                                                                |                                                                                              |                                                                                     |
| <b>Time frame: past 36 months</b>                         |                                                                                                                                                                                |                                                                                              |                                                                                     |
| 2                                                         | Grants or contracts from any entity (if not indicated in item #1 above).                                                                                                       | None                                                                                         |                                                                                     |
|                                                           |                                                                                                                                                                                |                                                                                              |                                                                                     |
|                                                           |                                                                                                                                                                                |                                                                                              |                                                                                     |
| 3                                                         | Royalties or licenses                                                                                                                                                          | None                                                                                         |                                                                                     |
|                                                           |                                                                                                                                                                                |                                                                                              |                                                                                     |
|                                                           |                                                                                                                                                                                |                                                                                              |                                                                                     |
| 4                                                         | Consulting fees                                                                                                                                                                | None                                                                                         |                                                                                     |

|    |                                                                                                              |      |  |
|----|--------------------------------------------------------------------------------------------------------------|------|--|
|    |                                                                                                              |      |  |
| 5  | Payment or honoraria for lectures, presentations, speakers bureaus, manuscript writing or educational events | None |  |
| 6  | Payment for expert testimony                                                                                 | None |  |
| 7  | Support for attending meetings and/or travel                                                                 | None |  |
| 8  | Patents planned, issued or pending                                                                           | None |  |
| 9  | Participation on a Data Safety Monitoring Board or Advisory Board                                            | None |  |
| 10 | Leadership or fiduciary role in other board, society, committee or advocacy group, paid or unpaid            | None |  |
| 11 | Stock or stock options                                                                                       | None |  |
| 12 | Receipt of equipment, materials, drugs, medical writing, gifts or other services                             | None |  |
| 13 | Other financial or non-financial interests                                                                   | None |  |

**Please summarize the above conflict of interest in the following box:**

NO CONFLICT OF INTEREST RELATED TO THIS WORK

**Please place an "X" next to the following statement to indicate your agreement:**



I certify that I have answered every question and have not altered the wording of any of the questions on this form.

## ICMJE DISCLOSURE FORM

Date: 2022-12-13

Your Name: Zhanhao Su

Manuscript Title: The SUPER 2022 reporting guideline for suggested reporting of surgical technique

Manuscript number (if known): HBSN-22-509-R1

In the interest of transparency, we ask you to disclose all relationships/activities/interests listed below that are related to the content of your manuscript. "Related" means any relation with for-profit or not-for-profit third parties whose interests may be affected by the content of the manuscript. Disclosure represents a commitment to transparency and does not necessarily indicate a bias. If you are in doubt about whether to list a relationship/activity/interest, it is preferable that you do so.

The following questions apply to the author's relationships/activities/interests as they relate to the current manuscript only.

The author's relationships/activities/interests should be defined broadly. For example, if your manuscript pertains to the epidemiology of hypertension, you should declare all relationships with manufacturers of antihypertensive medication, even if that medication is not mentioned in the manuscript.

In item #1 below, report all support for the work reported in this manuscript without time limit. For all other items, the time frame for disclosure is the past 36 months.

|                                                           |                                                                                                                                                                                | Name all entities with whom you have this relationship or indicate none (add rows as needed) | Specifications/Comments (e.g., if payments were made to you or to your institution) |
|-----------------------------------------------------------|--------------------------------------------------------------------------------------------------------------------------------------------------------------------------------|----------------------------------------------------------------------------------------------|-------------------------------------------------------------------------------------|
| <b>Time frame: Since the initial planning of the work</b> |                                                                                                                                                                                |                                                                                              |                                                                                     |
| 1                                                         | All support for the present manuscript (e.g., funding, provision of study materials, medical writing, article processing charges, etc.)<br><b>No time limit for this item.</b> | None                                                                                         |                                                                                     |
|                                                           |                                                                                                                                                                                |                                                                                              |                                                                                     |
|                                                           |                                                                                                                                                                                |                                                                                              |                                                                                     |
|                                                           |                                                                                                                                                                                |                                                                                              |                                                                                     |
|                                                           |                                                                                                                                                                                |                                                                                              |                                                                                     |
|                                                           |                                                                                                                                                                                |                                                                                              |                                                                                     |
| <b>Time frame: past 36 months</b>                         |                                                                                                                                                                                |                                                                                              |                                                                                     |
| 2                                                         | Grants or contracts from any entity (if not indicated in item #1 above).                                                                                                       | None                                                                                         |                                                                                     |
|                                                           |                                                                                                                                                                                |                                                                                              |                                                                                     |
| 3                                                         | Royalties or licenses                                                                                                                                                          | None                                                                                         |                                                                                     |
|                                                           |                                                                                                                                                                                |                                                                                              |                                                                                     |
| 4                                                         | Consulting fees                                                                                                                                                                | None                                                                                         |                                                                                     |
|                                                           |                                                                                                                                                                                |                                                                                              |                                                                                     |
|                                                           |                                                                                                                                                                                |                                                                                              |                                                                                     |

|    |                                                                                                              |      |  |
|----|--------------------------------------------------------------------------------------------------------------|------|--|
| 5  | Payment or honoraria for lectures, presentations, speakers bureaus, manuscript writing or educational events | None |  |
|    |                                                                                                              |      |  |
|    |                                                                                                              |      |  |
| 6  | Payment for expert testimony                                                                                 | None |  |
|    |                                                                                                              |      |  |
|    |                                                                                                              |      |  |
| 7  | Support for attending meetings and/or travel                                                                 | None |  |
|    |                                                                                                              |      |  |
|    |                                                                                                              |      |  |
| 8  | Patents planned, issued or pending                                                                           | None |  |
|    |                                                                                                              |      |  |
|    |                                                                                                              |      |  |
| 9  | Participation on a Data Safety Monitoring Board or Advisory Board                                            | None |  |
|    |                                                                                                              |      |  |
|    |                                                                                                              |      |  |
| 10 | Leadership or fiduciary role in other board, society, committee or advocacy group, paid or unpaid            | None |  |
|    |                                                                                                              |      |  |
|    |                                                                                                              |      |  |
| 11 | Stock or stock options                                                                                       | None |  |
|    |                                                                                                              |      |  |
|    |                                                                                                              |      |  |
| 12 | Receipt of equipment, materials, drugs, medical writing, gifts or other services                             | None |  |
|    |                                                                                                              |      |  |
|    |                                                                                                              |      |  |
| 13 | Other financial or non-financial interests                                                                   | None |  |
|    |                                                                                                              |      |  |
|    |                                                                                                              |      |  |

**Please summarize the above conflict of interest in the following box:**

None disclosed.

**Please place an "X" next to the following statement to indicate your agreement:**

  X   I certify that I have answered every question and have not altered the wording of any of the questions on this form.

## ICMJE DISCLOSURE FORM

Date: Dec. 14<sup>th</sup>, 2022

Your Name: Bin Qiu

Manuscript Title: The SUPER 2022 reporting guideline for suggested reporting of surgical technique

Manuscript number (if known): HBSN-22-509

In the interest of transparency, we ask you to disclose all relationships/activities/interests listed below that are related to the content of your manuscript. "Related" means any relation with for-profit or not-for-profit third parties whose interests may be affected by the content of the manuscript. Disclosure represents a commitment to transparency and does not necessarily indicate a bias. If you are in doubt about whether to list a relationship/activity/interest, it is preferable that you do so.

The following questions apply to the author's relationships/activities/interests as they relate to the current manuscript only.

The author's relationships/activities/interests should be defined broadly. For example, if your manuscript pertains to the epidemiology of hypertension, you should declare all relationships with manufacturers of antihypertensive medication, even if that medication is not mentioned in the manuscript.

In item #1 below, report all support for the work reported in this manuscript without time limit. For all other items, the time frame for disclosure is the past 36 months.

|                                                           |                                                                                                                                                                                | Name all entities with whom you have this relationship or indicate none (add rows as needed) | Specifications/Comments (e.g., if payments were made to you or to your institution) |
|-----------------------------------------------------------|--------------------------------------------------------------------------------------------------------------------------------------------------------------------------------|----------------------------------------------------------------------------------------------|-------------------------------------------------------------------------------------|
| <b>Time frame: Since the initial planning of the work</b> |                                                                                                                                                                                |                                                                                              |                                                                                     |
| 1                                                         | All support for the present manuscript (e.g., funding, provision of study materials, medical writing, article processing charges, etc.)<br><b>No time limit for this item.</b> | <input checked="" type="checkbox"/> None                                                     |                                                                                     |
|                                                           |                                                                                                                                                                                |                                                                                              |                                                                                     |
|                                                           |                                                                                                                                                                                |                                                                                              |                                                                                     |
|                                                           |                                                                                                                                                                                |                                                                                              |                                                                                     |
|                                                           |                                                                                                                                                                                |                                                                                              |                                                                                     |
| <b>Time frame: past 36 months</b>                         |                                                                                                                                                                                |                                                                                              |                                                                                     |
| 2                                                         | Grants or contracts from any entity (if not indicated in item #1 above).                                                                                                       | <input checked="" type="checkbox"/> None                                                     |                                                                                     |
|                                                           |                                                                                                                                                                                |                                                                                              |                                                                                     |
| 3                                                         | Royalties or licenses                                                                                                                                                          | <input checked="" type="checkbox"/> None                                                     |                                                                                     |
|                                                           |                                                                                                                                                                                |                                                                                              |                                                                                     |
| 4                                                         | Consulting fees                                                                                                                                                                | <input checked="" type="checkbox"/> None                                                     |                                                                                     |
|                                                           |                                                                                                                                                                                |                                                                                              |                                                                                     |

|    |                                                                                                              |                                          |  |
|----|--------------------------------------------------------------------------------------------------------------|------------------------------------------|--|
|    |                                                                                                              |                                          |  |
| 5  | Payment or honoraria for lectures, presentations, speakers bureaus, manuscript writing or educational events | <input checked="" type="checkbox"/> None |  |
| 6  | Payment for expert testimony                                                                                 | <input checked="" type="checkbox"/> None |  |
| 7  | Support for attending meetings and/or travel                                                                 | <input checked="" type="checkbox"/> None |  |
| 8  | Patents planned, issued or pending                                                                           | <input checked="" type="checkbox"/> None |  |
| 9  | Participation on a Data Safety Monitoring Board or Advisory Board                                            | <input checked="" type="checkbox"/> None |  |
| 10 | Leadership or fiduciary role in other board, society, committee or advocacy group, paid or unpaid            | <input checked="" type="checkbox"/> None |  |
| 11 | Stock or stock options                                                                                       | <input checked="" type="checkbox"/> None |  |
| 12 | Receipt of equipment, materials, drugs, medical writing, gifts or other services                             | <input checked="" type="checkbox"/> None |  |
| 13 | Other financial or non-financial interests                                                                   | <input checked="" type="checkbox"/> None |  |

**Please summarize the above conflict of interest in the following box:**

None.

**Please place an "X" next to the following statement to indicate your agreement:**

I certify that I have answered every question and have not altered the wording of any of the questions on this form.

## ICMJE DISCLOSURE FORM

Date: Dec 13, 2022

Your Name: Stephen D. Wang

Manuscript Title: The SUPER 2022 reporting guideline for suggested reporting of surgical technique

Manuscript number (if known): HBSN-22-509

In the interest of transparency, we ask you to disclose all relationships/activities/interests listed below that are related to the content of your manuscript. "Related" means any relation with for-profit or not-for-profit third parties whose interests may be affected by the content of the manuscript. Disclosure represents a commitment to transparency and does not necessarily indicate a bias. If you are in doubt about whether to list a relationship/activity/interest, it is preferable that you do so.

The following questions apply to the author's relationships/activities/interests as they relate to the current manuscript only.

The author's relationships/activities/interests should be defined broadly. For example, if your manuscript pertains to the epidemiology of hypertension, you should declare all relationships with manufacturers of antihypertensive medication, even if that medication is not mentioned in the manuscript.

In item #1 below, report all support for the work reported in this manuscript without time limit. For all other items, the time frame for disclosure is the past 36 months.

|                                                           |                                                                                                                                                                                | Name all entities with whom you have this relationship or indicate none (add rows as needed) | Specifications/Comments (e.g., if payments were made to you or to your institution) |
|-----------------------------------------------------------|--------------------------------------------------------------------------------------------------------------------------------------------------------------------------------|----------------------------------------------------------------------------------------------|-------------------------------------------------------------------------------------|
| <b>Time frame: Since the initial planning of the work</b> |                                                                                                                                                                                |                                                                                              |                                                                                     |
| 1                                                         | All support for the present manuscript (e.g., funding, provision of study materials, medical writing, article processing charges, etc.)<br><b>No time limit for this item.</b> | None                                                                                         |                                                                                     |
|                                                           |                                                                                                                                                                                |                                                                                              |                                                                                     |
|                                                           |                                                                                                                                                                                |                                                                                              |                                                                                     |
|                                                           |                                                                                                                                                                                |                                                                                              |                                                                                     |
|                                                           |                                                                                                                                                                                |                                                                                              |                                                                                     |
|                                                           |                                                                                                                                                                                |                                                                                              |                                                                                     |
| <b>Time frame: past 36 months</b>                         |                                                                                                                                                                                |                                                                                              |                                                                                     |
| 2                                                         | Grants or contracts from any entity (if not indicated in item #1 above).                                                                                                       | None                                                                                         |                                                                                     |
|                                                           |                                                                                                                                                                                |                                                                                              |                                                                                     |
|                                                           |                                                                                                                                                                                |                                                                                              |                                                                                     |
| 3                                                         | Royalties or licenses                                                                                                                                                          | None                                                                                         |                                                                                     |
|                                                           |                                                                                                                                                                                |                                                                                              |                                                                                     |
|                                                           |                                                                                                                                                                                |                                                                                              |                                                                                     |
| 4                                                         | Consulting fees                                                                                                                                                                | None                                                                                         |                                                                                     |
|                                                           |                                                                                                                                                                                |                                                                                              |                                                                                     |
|                                                           |                                                                                                                                                                                |                                                                                              |                                                                                     |

|    |                                                                                                              |                        |                                                                                                                          |
|----|--------------------------------------------------------------------------------------------------------------|------------------------|--------------------------------------------------------------------------------------------------------------------------|
| 5  | Payment or honoraria for lectures, presentations, speakers bureaus, manuscript writing or educational events | None                   |                                                                                                                          |
|    |                                                                                                              |                        |                                                                                                                          |
|    |                                                                                                              |                        |                                                                                                                          |
| 6  | Payment for expert testimony                                                                                 | None                   |                                                                                                                          |
|    |                                                                                                              |                        |                                                                                                                          |
|    |                                                                                                              |                        |                                                                                                                          |
| 7  | Support for attending meetings and/or travel                                                                 | None                   |                                                                                                                          |
|    |                                                                                                              |                        |                                                                                                                          |
|    |                                                                                                              |                        |                                                                                                                          |
| 8  | Patents planned, issued or pending                                                                           | None                   |                                                                                                                          |
|    |                                                                                                              |                        |                                                                                                                          |
|    |                                                                                                              |                        |                                                                                                                          |
| 9  | Participation on a Data Safety Monitoring Board or Advisory Board                                            | None                   |                                                                                                                          |
|    |                                                                                                              |                        |                                                                                                                          |
|    |                                                                                                              |                        |                                                                                                                          |
| 10 | Leadership or fiduciary role in other board, society, committee or advocacy group, paid or unpaid            | None                   |                                                                                                                          |
|    |                                                                                                              |                        |                                                                                                                          |
|    |                                                                                                              |                        |                                                                                                                          |
| 11 | Stock or stock options                                                                                       | None                   |                                                                                                                          |
|    |                                                                                                              |                        |                                                                                                                          |
|    |                                                                                                              |                        |                                                                                                                          |
| 12 | Receipt of equipment, materials, drugs, medical writing, gifts or other services                             | None                   |                                                                                                                          |
|    |                                                                                                              |                        |                                                                                                                          |
|    |                                                                                                              |                        |                                                                                                                          |
| 13 | Other financial or non-financial interests                                                                   | AME Publishing Company | Stephen D. Wang is a full-time employee of AME Publishing Company (the publisher of Hepatobiliary Surgery and Nutrition) |
|    |                                                                                                              |                        |                                                                                                                          |
|    |                                                                                                              |                        |                                                                                                                          |

**Please summarize the above conflict of interest in the following box:**

Stephen D. Wang is a full-time employee of AME publishing company (publisher of Hepatobiliary Surgery and Nutrition).

**Please place an "X" next to the following statement to indicate your agreement:**

I certify that I have answered every question and have not altered the wording of any of the questions on this form.



## ICMJE DISCLOSURE FORM

Date: Dec. 14<sup>th</sup>, 2022

Your Name: Yaolong Chen

Manuscript Title: The SUPER 2022 reporting guideline for suggested reporting of surgical technique

Manuscript number (if known): HBSN-22-509

In the interest of transparency, we ask you to disclose all relationships/activities/interests listed below that are related to the content of your manuscript. "Related" means any relation with for-profit or not-for-profit third parties whose interests may be affected by the content of the manuscript. Disclosure represents a commitment to transparency and does not necessarily indicate a bias. If you are in doubt about whether to list a relationship/activity/interest, it is preferable that you do so.

The following questions apply to the author's relationships/activities/interests as they relate to the current manuscript only.

The author's relationships/activities/interests should be defined broadly. For example, if your manuscript pertains to the epidemiology of hypertension, you should declare all relationships with manufacturers of antihypertensive medication, even if that medication is not mentioned in the manuscript.

In item #1 below, report all support for the work reported in this manuscript without time limit. For all other items, the time frame for disclosure is the past 36 months.

|                                                           |                                                                                                                                                                                | Name all entities with whom you have this relationship or indicate none (add rows as needed) | Specifications/Comments (e.g., if payments were made to you or to your institution) |
|-----------------------------------------------------------|--------------------------------------------------------------------------------------------------------------------------------------------------------------------------------|----------------------------------------------------------------------------------------------|-------------------------------------------------------------------------------------|
| <b>Time frame: Since the initial planning of the work</b> |                                                                                                                                                                                |                                                                                              |                                                                                     |
| 1                                                         | All support for the present manuscript (e.g., funding, provision of study materials, medical writing, article processing charges, etc.)<br><b>No time limit for this item.</b> | <u>__X__</u> None                                                                            |                                                                                     |
|                                                           |                                                                                                                                                                                |                                                                                              |                                                                                     |
|                                                           |                                                                                                                                                                                |                                                                                              |                                                                                     |
|                                                           |                                                                                                                                                                                |                                                                                              |                                                                                     |
|                                                           |                                                                                                                                                                                |                                                                                              |                                                                                     |
|                                                           |                                                                                                                                                                                |                                                                                              |                                                                                     |
| <b>Time frame: past 36 months</b>                         |                                                                                                                                                                                |                                                                                              |                                                                                     |
| 2                                                         | Grants or contracts from any entity (if not indicated in item #1 above).                                                                                                       | <u>__X__</u> None                                                                            |                                                                                     |
|                                                           |                                                                                                                                                                                |                                                                                              |                                                                                     |
| 3                                                         | Royalties or licenses                                                                                                                                                          | <u>__X__</u> None                                                                            |                                                                                     |
|                                                           |                                                                                                                                                                                |                                                                                              |                                                                                     |
| 4                                                         | Consulting fees                                                                                                                                                                | <u>__X__</u> None                                                                            |                                                                                     |
|                                                           |                                                                                                                                                                                |                                                                                              |                                                                                     |

|    |                                                                                                              |                                          |  |
|----|--------------------------------------------------------------------------------------------------------------|------------------------------------------|--|
|    |                                                                                                              |                                          |  |
| 5  | Payment or honoraria for lectures, presentations, speakers bureaus, manuscript writing or educational events | <input checked="" type="checkbox"/> None |  |
| 6  | Payment for expert testimony                                                                                 | <input checked="" type="checkbox"/> None |  |
| 7  | Support for attending meetings and/or travel                                                                 | <input checked="" type="checkbox"/> None |  |
| 8  | Patents planned, issued or pending                                                                           | <input checked="" type="checkbox"/> None |  |
| 9  | Participation on a Data Safety Monitoring Board or Advisory Board                                            | <input checked="" type="checkbox"/> None |  |
| 10 | Leadership or fiduciary role in other board, society, committee or advocacy group, paid or unpaid            | <input checked="" type="checkbox"/> None |  |
| 11 | Stock or stock options                                                                                       | <input checked="" type="checkbox"/> None |  |
| 12 | Receipt of equipment, materials, drugs, medical writing, gifts or other services                             | <input checked="" type="checkbox"/> None |  |
| 13 | Other financial or non-financial interests                                                                   | <input checked="" type="checkbox"/> None |  |

**Please summarize the above conflict of interest in the following box:**

None.

**Please place an "X" next to the following statement to indicate your agreement:**

I certify that I have answered every question and have not altered the wording of any of the questions on this form.

## ICMJE DISCLOSURE FORM

Date: Dec. 14<sup>th</sup>, 2022

Your Name: Shugeng Gao

Manuscript Title: The SUPER 2022 reporting guideline for suggested reporting of surgical technique

Manuscript number (if known): HBSN-22-509

In the interest of transparency, we ask you to disclose all relationships/activities/interests listed below that are related to the content of your manuscript. "Related" means any relation with for-profit or not-for-profit third parties whose interests may be affected by the content of the manuscript. Disclosure represents a commitment to transparency and does not necessarily indicate a bias. If you are in doubt about whether to list a relationship/activity/interest, it is preferable that you do so.

The following questions apply to the author's relationships/activities/interests as they relate to the current manuscript only.

The author's relationships/activities/interests should be defined broadly. For example, if your manuscript pertains to the epidemiology of hypertension, you should declare all relationships with manufacturers of antihypertensive medication, even if that medication is not mentioned in the manuscript.

In item #1 below, report all support for the work reported in this manuscript without time limit. For all other items, the time frame for disclosure is the past 36 months.

|                                                           |                                                                                                                                                                                | Name all entities with whom you have this relationship or indicate none (add rows as needed) | Specifications/Comments (e.g., if payments were made to you or to your institution) |
|-----------------------------------------------------------|--------------------------------------------------------------------------------------------------------------------------------------------------------------------------------|----------------------------------------------------------------------------------------------|-------------------------------------------------------------------------------------|
| <b>Time frame: Since the initial planning of the work</b> |                                                                                                                                                                                |                                                                                              |                                                                                     |
| 1                                                         | All support for the present manuscript (e.g., funding, provision of study materials, medical writing, article processing charges, etc.)<br><b>No time limit for this item.</b> | <u>__X__</u> None                                                                            |                                                                                     |
|                                                           |                                                                                                                                                                                |                                                                                              |                                                                                     |
|                                                           |                                                                                                                                                                                |                                                                                              |                                                                                     |
|                                                           |                                                                                                                                                                                |                                                                                              |                                                                                     |
|                                                           |                                                                                                                                                                                |                                                                                              |                                                                                     |
|                                                           |                                                                                                                                                                                |                                                                                              |                                                                                     |
| <b>Time frame: past 36 months</b>                         |                                                                                                                                                                                |                                                                                              |                                                                                     |
| 2                                                         | Grants or contracts from any entity (if not indicated in item #1 above).                                                                                                       | <u>__X__</u> None                                                                            |                                                                                     |
|                                                           |                                                                                                                                                                                |                                                                                              |                                                                                     |
| 3                                                         | Royalties or licenses                                                                                                                                                          | <u>__X__</u> None                                                                            |                                                                                     |
|                                                           |                                                                                                                                                                                |                                                                                              |                                                                                     |
| 4                                                         | Consulting fees                                                                                                                                                                | <u>__X__</u> None                                                                            |                                                                                     |
|                                                           |                                                                                                                                                                                |                                                                                              |                                                                                     |

|    |                                                                                                              |                                          |  |
|----|--------------------------------------------------------------------------------------------------------------|------------------------------------------|--|
|    |                                                                                                              |                                          |  |
| 5  | Payment or honoraria for lectures, presentations, speakers bureaus, manuscript writing or educational events | <input checked="" type="checkbox"/> None |  |
| 6  | Payment for expert testimony                                                                                 | <input checked="" type="checkbox"/> None |  |
| 7  | Support for attending meetings and/or travel                                                                 | <input checked="" type="checkbox"/> None |  |
| 8  | Patents planned, issued or pending                                                                           | <input checked="" type="checkbox"/> None |  |
| 9  | Participation on a Data Safety Monitoring Board or Advisory Board                                            | <input checked="" type="checkbox"/> None |  |
| 10 | Leadership or fiduciary role in other board, society, committee or advocacy group, paid or unpaid            | <input checked="" type="checkbox"/> None |  |
| 11 | Stock or stock options                                                                                       | <input checked="" type="checkbox"/> None |  |
| 12 | Receipt of equipment, materials, drugs, medical writing, gifts or other services                             | <input checked="" type="checkbox"/> None |  |
| 13 | Other financial or non-financial interests                                                                   | <input checked="" type="checkbox"/> None |  |

**Please summarize the above conflict of interest in the following box:**

None.

**Please place an "X" next to the following statement to indicate your agreement:**

I certify that I have answered every question and have not altered the wording of any of the questions on this form.
